# Supplementary material
Source: PubMed Central journal article supplement (PMC4790480)
Supplement: hana001240.ww1_default.pdf [file hana001240.ww1_default.pdf]

| Item_Description                            | Journal | Year of r | Volume | Issue | Case-con<br>0=contro |
|---------------------------------------------|---------|-----------|--------|-------|----------------------|
| A randomised, blinded, trial of clopidogrel | Lancet  |           | 348    | 9038  | 1                    |
| A randomised, blinded, trial of clopidogrel | Lancet  | 2003      | 348    | 9038  | 1                    |
| A randomised, blinded, trial of clopidogrel | Lancet  | 2004      | 348    | 9038  | 1                    |
| A randomised, blinded, trial of clopidogrel | Lancet  | 2005      | 348    | 9038  | 1                    |
| A randomised, blinded, trial of clopidogrel | Lancet  | 2006      | 348    | 9038  | 1                    |
| A randomised, blinded, trial of clopidogrel | Lancet  | 2007      | 348    | 9038  | 1                    |
| A randomised, blinded, trial of clopidogrel | Lancet  | 2009      | 348    | 9038  | 1                    |
| Acarbose for prevention of type 2 diab      | Lancet  | 2002      | 359    | 9323  | 1                    |
| Addition of clopidogrel to aspirin in 45    | Lancet  | 2007      | 366    | 9497  | 1                    |
| Addition of clopidogrel to aspirin in 45    | Lancet  | 2006      | 366    | 9497  | 1                    |
| Adjuvant imatinib mesylate after resec      | Lancet  | 2009      | 373    | 9669  | 1                    |
| After FIELD: should fibrates be used to     | Lancet  | 2006      | 366    | 9500  | 1                    |
| Aspirin and clopidogrel compared with       | Lancet  | 2004      | 364    | 9431  | 1                    |
| Aspirin and clopidogrel compared with       | Lancet  | 2005      | 364    | 9431  | 1                    |
| Aspirin and clopidogrel compared with       | Lancet  | 2006      | 364    | 9431  | 1                    |
| Aspirin plus dipyridamole versus aspiri     | Lancet  | 2006      | 367    | 9523  | 1                    |
| Bevacizumab plus interferon alfa-2a fo      | Lancet  | 2008      | 370    | 9605  | 1                    |
| Cardiovascular morbidity and mortality      | Lancet  | 2002      | 359    | 9311  | 1                    |
| Cardiovascular morbidity and mortality      | Lancet  | 2003      | 359    | 9311  | 1                    |
| Cardiovascular morbidity and mortality      | Lancet  | 2004      | 359    | 9311  | 1                    |
| Cardiovascular morbidity and mortality      | Lancet  | 2003      | 359    | 9311  | 1                    |
| Cardiovascular morbidity and mortality      | Lancet  | 2004      | 359    | 9311  | 1                    |
| Cardiovascular morbidity and mortality      | Lancet  | 2005      | 359    | 9311  | 1                    |
| Cardiovascular morbidity and mortality      | Lancet  | 2002      | 359    | 9311  | 1                    |
| Cardiovascular outcomes with etoricox       | Lancet  | 2006      | 368    | 9549  | 1                    |
| Cardiovascular outcomes with etoricox       | Lancet  | 2007      | 368    | 9549  | 1                    |
| Comparative efficacy and acceptability      | Lancet  | 2009      | 373    | 9665  | 1                    |
| Comparison of carvedilol and metopro        | Lancet  | 2003      | 362    | 9377  | 1                    |
| Comparison of carvedilol and metopro        | Lancet  | 2004      | 362    | 9377  | 1                    |
| Comparison of carvedilol and metopro        | Lancet  | 2006      | 362    | 9377  | 1                    |
| Comparison of lumiracoxib with napro        | Lancet  | 2004      | 364    | 9435  | 1                    |
| Comparison of lumiracoxib with napro        | Lancet  | 2005      | 364    | 9435  | 1                    |
| Comparison of methotrexate monothe          | Lancet  | 2008      | 372    | 9636  | 1                    |
| COX-2 selective non-steroidal anti-infl.    | Lancet  | 2003      | 360    | 9339  | 1                    |
| COX-2 selective non-steroidal anti-infl.    | Lancet  | 2004      | 360    | 9339  | 1                    |
| Cyclo-oxygenase-2 inhibitors versus n       | Lancet  | 2004      | 363    | 9423  | 1                    |
| Cyclo-oxygenase-2 inhibitors versus n       | Lancet  | 2006      | 363    | 9423  | 1                    |
| Donepezil in patients with severe alz       | Lancet  | 2006      | 367    | 6516  | 1                    |
| Donepezil in patients with severe alz       | Lancet  | 2007      | 367    | 6516  | 1                    |
| Donepezil in patients with severe alz       | Lancet  | 2008      | 367    | 6516  | 1                    |
| Durable efficacy of tipranavir-ritonavir    | Lancet  | 2006      | 368    | 9534  | 1                    |
| Effect of ACE inhibitor trandolapril on I   | Lancet  | 2002      | 354    | 9172  | 1                    |
| Effect of aggressive versus convention      | Lancet  | 2008      | 357    | 9256  | 1                    |
| Effect of carvedilol on outcome after r     | Lancet  | 2003      | 357    | 9266  | 1                    |
| Effect of carvedilol on outcome after r     | Lancet  | 2007      | 357    | 9266  | 1                    |
| Effect of early versus delayed interferc    | Lancet  | 2007      | 370    | 9585  | 1                    |
| Effect of fenofibrate on progression of     | Lancet  | 2007      | 357    | 9260  | 1                    |
| Effect of fenofibrate on progression of     | Lancet  | 2008      | 357    | 9260  | 1                    |
| Effect of fenofibrate on the need for la    | Lancet  | 2008      | 370    | 9600  | 1                    |
| Effect of ibuprofen on cardioprotective     | Lancet  | 2004      | 361    | 9357  | 1                    |

|                                                                     |        |      |     |      |   |
|---------------------------------------------------------------------|--------|------|-----|------|---|
| Effect of interleukin-6 receptor inhibitor in patients with         | Lancet | 2008 | 371 | 9617 | 1 |
| Effect of sibutramine on weight maintenance in obese patients       | Lancet | 2002 | 356 | 9248 | 1 |
| Effectiveness of antipsychotic drugs in patients with schizophrenia | Lancet | 2008 | 371 | 9618 | 1 |
| Effects of candesartan in patients with hypertension                | Lancet | 2003 | 362 | 9386 | 1 |
| Effects of candesartan in patients with hypertension                | Lancet | 2005 | 362 | 9386 | 1 |
| Effects of candesartan in patients with hypertension                | Lancet | 2003 | 362 | 9386 | 1 |
| Effects of candesartan in patients with hypertension                | Lancet | 2005 | 362 | 9386 | 1 |
| Effects of candesartan in patients with hypertension                | Lancet | 2003 | 362 | 9386 | 1 |
| Effects of cholesterol-lowering with statins in patients with       | Lancet | 2004 | 363 | 9411 | 1 |
| Effects of long-term fenofibrate therapy in patients with           | Lancet | 2005 | 366 | 9500 | 1 |
| Effects of long-term fenofibrate therapy in patients with           | Lancet | 2006 | 366 | 9500 | 1 |
| Effects of pretreatment with clopidogrel in patients with           | Lancet | 2005 | 358 | 9281 | 1 |
| Effects of pretreatment with clopidogrel in patients with           | Lancet | 2002 | 358 | 9281 | 1 |
| Effects of the angiotensin-receptor blocker losartan in patients    | Lancet | 2009 | 372 | 9644 | 1 |
| Effects of the cannabinoid-1 receptor antagonist rimonabant in      | Lancet | 2006 | 365 | 9468 | 1 |
| Efficacy and safety of balloon kyphoplasty in patients with         | Lancet | 2009 | 373 | 9668 | 1 |
| Efficacy and safety of intravenous levonorgestrel in patients       | Lancet | 2002 | 360 | 9328 | 1 |
| Efficacy and safety of sunitinib in patients with metastatic        | Lancet | 2007 | 368 | 9544 | 1 |
| Efficacy and safety of tenecteplase in patients with acute          | Lancet | 2002 | 358 | 9282 | 1 |
| Efficacy and safety of TMC125 (etravirine) in patients with         | Lancet | 2007 | 370 | 9581 | 1 |
| Efficacy and safety of TMC125 (etravirine) in patients with         | Lancet | 2007 | 370 | 9581 | 1 |
| Efficacy and tolerability of rimonabant in patients with            | Lancet | 2006 | 368 | 9548 | 1 |
| Efficacy of galantamine in probable and possible Alzheimer's        | Lancet | 2002 | 359 | 9314 | 1 |
| Efficacy of human papillomavirus (HPV) vaccine in women             | Lancet | 2009 | 374 | 9686 | 1 |
| Efficacy of human rotavirus vaccine in children                     | Lancet | 2008 | 370 | 9601 | 1 |
| Efficacy of perindopril in reduction of cardiovascular morbidity    | Lancet | 2003 | 362 | 9386 | 1 |
| Efficacy of perindopril in reduction of cardiovascular morbidity    | Lancet | 2005 | 362 | 9386 | 1 |
| Efficacy of romiplostim in patients with thrombocytopenia           | Lancet | 2008 | 371 | 9610 | 1 |
| Ertapenem versus piperacillin/tazobactam in patients with           | Lancet | 2005 | 366 | 9498 | 1 |
| Ertapenem versus piperacillin/tazobactam in patients with           | Lancet | 2006 | 366 | 9498 | 1 |
| Ertapenem versus piperacillin/tazobactam in patients with           | Lancet | 2007 | 366 | 9498 | 1 |
| Ertapenem versus piperacillin/tazobactam in patients with           | Lancet | 2008 | 366 | 9498 | 1 |
| Extended duration rivaroxaban versus aspirin in patients with       | Lancet | 2008 | 372 | 9632 | 1 |
| Extended duration rivaroxaban versus aspirin in patients with       | Lancet | 2009 | 372 | 9632 | 1 |
| Fighting obesity and associated risk factors in patients with       | Lancet | 2005 | 365 | 9468 | 1 |
| Glucose metabolism in patients with type 2 diabetes                 | Lancet | 2007 | 359 | 9324 | 1 |
| Intensive oral antiplatelet therapy for patients with acute         | Lancet | 2009 | 371 | 9621 | 1 |
| Interventional versus conservative treatment of acute               | Lancet | 2002 | 360 | 9335 | 1 |
| Lessons from MATCH for future randomised controlled trials          | Lancet | 2006 | 364 | 9431 | 1 |
| Liraglutide once a day versus exenatide in patients with            | Lancet | 2009 | 374 | 9683 | 1 |
| Liraglutide versus glimepiride monotherapy in patients with         | Lancet | 2009 | 373 | 9662 | 1 |
| Micafungin versus liposomal amphotericin B in patients with         | Lancet | 2007 | 369 | 9572 | 1 |
| MRC/BHF Heart Protection Study of cholesterol treatment in          | Lancet | 2004 | 360 | 9326 | 1 |
| MRC/BHF Heart Protection Study of cholesterol treatment in          | Lancet | 2008 | 360 | 9326 | 1 |
| MRC/BHF Heart Protection Study of cholesterol treatment in          | Lancet | 2002 | 360 | 9326 | 1 |
| MRC/BHF Heart Protection Study of cholesterol treatment in          | Lancet | 2003 | 361 | 9374 | 1 |
| MRC/BHF Heart Protection Study of cholesterol treatment in          | Lancet | 2004 | 361 | 9374 | 1 |
| Negative pressure wound therapy after lower limb amputation         | Lancet | 2008 | 366 | 9498 | 1 |
| Non-steroidal anti-inflammatory drugs in patients with              | Lancet | 2002 | 359 | 9301 | 1 |
| Once-daily atazanavir/ritonavir versus zidovudine/zalcitabine       | Lancet | 2008 | 372 | 9639 | 1 |
| Outcomes in hypertensive patients at high cardiovascular risk       | Lancet | 2004 | 363 | 9426 | 1 |
| Postoperative fondaparinux versus placebo in patients with          | Lancet | 2002 | 359 | 9319 | 1 |

|                                                |             |     |      |   |
|------------------------------------------------|-------------|-----|------|---|
| Postoperative fondaparinux versus pre Lancet   | <u>2005</u> | 359 | 9319 | 1 |
| Postoperative fondaparinux versus pre Lancet   | 2002        | 359 | 9319 | 1 |
| Prasugrel compared with clopidogrel ir Lancet  | 2009        | 373 | 9665 | 1 |
| Prevention of cardiovascular events wi Lancet  | 2005        | 366 | 9489 | 1 |
| Prevention of cardiovascular events wi Lancet  | <u>2007</u> | 366 | 9489 | 1 |
| Prevention of coronary and stroke eve Lancet   | 2003        | 361 | 9364 | 1 |
| Prevention of coronary and stroke eve Lancet   | 2004        | 361 | 9364 | 1 |
| Prevention of coronary and stroke eve Lancet   | 2005        | 361 | 9364 | 1 |
| Prevention of coronary and stroke eve Lancet   | 2006        | 361 | 9364 | 1 |
| Prevention of coronary and stroke eve Lancet   | 2007        | 361 | 9364 | 1 |
| Primary prevention of cardiovascular c Lancet  | 2005        | 364 | 9435 | 1 |
| Primary prevention of cardiovascular c Lancet  | 2007        | 364 | 9435 | 1 |
| Primary prevention of cardiovascular c Lancet  | 2004        | 364 | 9435 | 1 |
| Randomised double-blind placebo-cont Lancet    | 2009        | 352 | 9139 | 1 |
| Randomised trial of effect of alendrona Lancet | 2004        | 348 | 9041 | 1 |
| Randomised trial of effect of alendrona Lancet | 2006        | 348 | 9041 | 1 |
| Rasagiline as an adjunct to levodopa ii Lancet | 2006        | 365 | 9463 | 1 |
| Risk of acute myocardial infarction anc Lancet | 2005        | 365 | 9458 | 1 |
| Risk of acute myocardial infarction anc Lancet | 2006        | 365 | 9458 | 1 |
| Rivaroxaban versus enoxaparin for thr Lancet   | 2009        | 373 | 9676 | 1 |
| Roflumilast in symptomatic chronic ob Lancet   | 2009        | 374 | 9691 | 1 |
| Rosiglitazone evaluated for cardiovasc Lancet  | 2009        | 373 | 9679 | 1 |
| Safety and efficacy of raltegravir-base Lancet | 2009        | 374 | 9692 | 1 |
| Secondary prevention of macrovasculæ Lancet    | 2005        | 366 | 9493 | 1 |
| Secondary prevention of macrovasculæ Lancet    | 2007        | 366 | 9493 | 1 |
| Secondary prevention of macrovasculæ Lancet    | 2009        | 366 | 9493 | 1 |
| Survival and safety of exemestane ver Lancet   | 2007        | 369 | 9561 | 1 |
| The efficacy and safety of enoxaparin · Lancet | 2008        | 369 | 9570 | 1 |
| Treatment of patients with mildly sym Lancet   | 2009        | 371 | 9630 | 1 |
| Treatment of patients with mildly sym Lancet   | 2008        | 371 | 9630 | 1 |
| Validation and refinement of scores to Lancet  | 2008        | 369 | 9558 | 1 |
| Valsartan in a Japanese population wit Lancet  | 2007        | 369 | 9571 | 1 |
| Voriconazole versus a regimen of amp Lancet    | 2008        | 366 | 9495 | 1 |
| Amer-Wahlin I et al Lancet                     | <u>2005</u> | 358 | 9281 | 0 |
| Amer-Wahlin I et al Lancet                     | 2002        | 358 | 9281 | 0 |
| Ananworanich Lancet                            | 2006        | 368 | 9534 | 0 |
| ART Lancet                                     | <u>2005</u> | 362 | 9386 | 0 |
| ART Lancet                                     | 2003        | 362 | 9386 | 0 |
| ATAC Lancet                                    | 2007        | 359 | 9324 | 0 |
| Bobat Lancet                                   | 2005        | 366 | 9500 | 0 |
| Bobat Lancet                                   | 2006        | 366 | 9500 | 0 |
| Bresson Lancet                                 | 2006        | 367 | 9523 | 0 |
| Bretzel Lancet                                 | 2008        | 371 | 9618 | 0 |
| Bulkmans Lancet                                | 2008        | 370 | 9601 | 0 |
| Burns Lancet                                   | 2005        | 365 | 9468 | 0 |
| Chadwick D et al Lancet                        | 2002        | 354 | 9172 | 0 |
| Chi Lancet                                     | <u>2008</u> | 370 | 9600 | 0 |
| Cleland Lancet                                 | 2003        | 362 | 9377 | 0 |
| Cleland Lancet                                 | 2004        | 362 | 9377 | 0 |
| Cleland Lancet                                 | 2006        | 362 | 9377 | 0 |
| Cohen Lancet                                   | 2008        | 371 | 9610 | 0 |
| Collaborative Group on Hormonal Fact Lancet    | 2002        | 360 | 9328 | 0 |

|                                        |        |      |     |      |   |
|----------------------------------------|--------|------|-----|------|---|
| Collet                                 | Lancet | 2008 | 357 | 9256 | 0 |
| Comi                                   | Lancet | 2009 | 371 | 9630 | 0 |
| Comi                                   | Lancet | 2008 | 371 | 9630 | 0 |
| COMMIT                                 | Lancet | 2007 | 366 | 9497 | 0 |
| COMMIT                                 | Lancet | 2006 | 366 | 9497 | 0 |
| Contant                                | Lancet | 2008 | 370 | 9605 | 0 |
| CTT                                    | Lancet | 2005 | 366 | 9493 | 0 |
| CTT                                    | Lancet | 2007 | 366 | 9493 | 0 |
| CTT                                    | Lancet | 2009 | 366 | 9493 | 0 |
| Danaei                                 | Lancet | 2006 | 368 | 9548 | 0 |
| Dickstein K et al                      | Lancet | 2002 | 360 | 9335 | 0 |
| Ellis                                  | Lancet | 2009 | 373 | 9676 | 0 |
| Fabbri                                 | Lancet | 2009 | 374 | 9691 | 0 |
| Farkouh                                | Lancet | 2004 | 364 | 9435 | 0 |
| Farkouh                                | Lancet | 2005 | 364 | 9435 | 0 |
| Gauderman                              | Lancet | 2007 | 369 | 9561 | 0 |
| Glioma Meta-analysis Trialists Group   | Lancet | 2003 | 359 | 9311 | 0 |
| Glioma Meta-analysis Trialists Group   | Lancet | 2004 | 359 | 9311 | 0 |
| Glioma Meta-analysis Trialists Group   | Lancet | 2005 | 359 | 9311 | 0 |
| Glioma Meta-analysis Trialists Group   | Lancet | 2002 | 359 | 9311 | 0 |
| Goodman                                | Lancet | 2009 | 373 | 9665 | 0 |
| Grassly                                | Lancet | 2008 | 369 | 9570 | 0 |
| Greenman                               | Lancet | 2008 | 366 | 9498 | 0 |
| Griffiths                              | Lancet | 2007 | 369 | 9572 | 0 |
| Grulich                                | Lancet | 2007 | 370 | 9581 | 0 |
| Gu                                     | Lancet | 2006 | 365 | 9468 | 0 |
| Heart Protection Study Collaborative G | Lancet | 2004 | 360 | 9326 | 0 |
| Heart Protection Study Collaborative G | Lancet | 2008 | 360 | 9326 | 0 |
| Heart Protection Study Collaborative G | Lancet | 2002 | 360 | 9326 | 0 |
| Heerspink                              | Lancet | 2009 | 373 | 9668 | 0 |
| Henry                                  | Lancet | 2004 | 361 | 9357 | 0 |
| Jabre                                  | Lancet | 2009 | 374 | 9686 | 0 |
| Kang                                   | Lancet | 2004 | 363 | 9411 | 0 |
| Kappos                                 | Lancet | 2009 | 352 | 9139 | 0 |
| Khan                                   | Lancet | 2006 | 367 | 6516 | 0 |
| Khan                                   | Lancet | 2007 | 367 | 6516 | 0 |
| Khan                                   | Lancet | 2008 | 367 | 6516 | 0 |
| Lakha                                  | Lancet | 2006 | 368 | 9549 | 0 |
| Lakha                                  | Lancet | 2007 | 368 | 9549 | 0 |
| Lantieri                               | Lancet | 2008 | 372 | 9639 | 0 |
| Llovet JM et al                        | Lancet | 2002 | 359 | 9319 | 0 |
| Madruca                                | Lancet | 2007 | 370 | 9581 | 0 |
| Masip J et al                          | Lancet | 2002 | 356 | 9248 | 0 |
| McCarey                                | Lancet | 2004 | 363 | 9426 | 0 |
| McNally                                | Lancet | 2007 | 369 | 9571 | 0 |
| Mega                                   | Lancet | 2009 | 374 | 9683 | 0 |
| Michels                                | Lancet | 2004 | 348 | 9041 | 0 |
| Michels                                | Lancet | 2006 | 348 | 9041 | 0 |
| Moller AM et al                        | Lancet | 2002 | 359 | 9301 | 0 |
| Moore                                  | Lancet | 2006 | 366 | 9500 | 0 |
| MRC oesophageal cancer working part    | Lancet | 2005 | 359 | 9319 | 0 |
| MRC oesophageal cancer working part    | Lancet | 2002 | 359 | 9319 | 0 |

|                                      |        |      |     |      |   |
|--------------------------------------|--------|------|-----|------|---|
| Myles                                | Lancet | 2004 | 363 | 9423 | 0 |
| Myles                                | Lancet | 2006 | 363 | 9423 | 0 |
| Neth O et al                         | Lancet | 2002 | 358 | 9282 | 0 |
| Pfeffer                              | Lancet | 2005 | 362 | 9386 | 0 |
| Pfeffer                              | Lancet | 2003 | 362 | 9386 | 0 |
| Poulter                              | Lancet | 2005 | 366 | 9489 | 0 |
| Poulter                              | Lancet | 2007 | 366 | 9489 | 0 |
| Prospective Studies Collaboration    | Lancet | 2009 | 373 | 9669 | 0 |
| Rajatnam                             | Lancet | 2009 | 373 | 9662 | 0 |
| Ravishankar                          | Lancet | 2009 | 373 | 9679 | 0 |
| Rigg JRA et al                       | Lancet | 2002 | 359 | 9314 | 0 |
| Righini                              | Lancet | 2009 | 371 | 9621 | 0 |
| Rugenenti                            | Lancet | 2006 | 365 | 9463 | 0 |
| Ruperto                              | Lancet | 2008 | 372 | 9636 | 0 |
| Sabatine                             | Lancet | 2009 | 374 | 9692 | 0 |
| Sankaranarayanan                     | Lancet | 2007 | 370 | 9585 | 0 |
| Sanz                                 | Lancet | 2005 | 365 | 9458 | 0 |
| Sanz                                 | Lancet | 2006 | 365 | 9458 | 0 |
| Schmitz N et al                      | Lancet | 2002 | 359 | 9323 | 0 |
| Schnabel                             | Lancet | 2009 | 373 | 9665 | 0 |
| Schortgen                            | Lancet | 2007 | 357 | 9260 | 0 |
| Schortgen                            | Lancet | 2008 | 357 | 9260 | 0 |
| Short                                | Lancet | 2006 | 364 | 9431 | 0 |
| Smith                                | Lancet | 2003 | 361 | 9364 | 0 |
| Smith                                | Lancet | 2004 | 361 | 9364 | 0 |
| Smith                                | Lancet | 2005 | 361 | 9364 | 0 |
| Smith                                | Lancet | 2006 | 361 | 9364 | 0 |
| Smith                                | Lancet | 2007 | 361 | 9364 | 0 |
| Soysal                               | Lancet | 2008 | 366 | 9495 | 0 |
| Stephenson                           | Lancet | 2004 | 364 | 9431 | 0 |
| Stephenson                           | Lancet | 2005 | 364 | 9431 | 0 |
| Stephenson                           | Lancet | 2006 | 364 | 9431 | 0 |
| Stiell                               | Lancet | 2003 | 357 | 9266 | 0 |
| Stiell                               | Lancet | 2007 | 357 | 9266 | 0 |
| Strong                               | Lancet | 2008 | 372 | 9632 | 0 |
| Strong                               | Lancet | 2009 | 372 | 9632 | 0 |
| Tkachev                              | Lancet | 2003 | 362 | 9386 | 0 |
| Tkachev                              | Lancet | 2005 | 362 | 9386 | 0 |
| van der Meulen                       | Lancet | 2005 | 364 | 9435 | 0 |
| van der Meulen                       | Lancet | 2007 | 364 | 9435 | 0 |
| van der Meulen                       | Lancet | 2004 | 364 | 9435 | 0 |
| Vivekananthan                        | Lancet | 2003 | 361 | 9374 | 0 |
| Vivekananthan                        | Lancet | 2004 | 361 | 9374 | 0 |
| Vora                                 | Lancet | 2007 | 368 | 9544 | 0 |
| Wahlgren                             | Lancet | 2008 | 369 | 9558 | 0 |
| Wallentin                            | Lancet | 2003 | 362 | 9386 | 0 |
| Wallis                               | Lancet | 2003 | 360 | 9339 | 0 |
| Wallis                               | Lancet | 2004 | 360 | 9339 | 0 |
| West of Scotland Coronary Prevention | Lancet | 2002 | 348 | 9038 | 0 |
| West of Scotland Coronary Prevention | Lancet | 2003 | 348 | 9038 | 0 |
| West of Scotland Coronary Prevention | Lancet | 2004 | 348 | 9038 | 0 |
| West of Scotland Coronary Prevention | Lancet | 2005 | 348 | 9038 | 0 |

|                                                       |              |      |     |      |   |
|-------------------------------------------------------|--------------|------|-----|------|---|
| West of Scotland Coronary Prevention                  | Lancet       | 2006 | 348 | 9038 | 0 |
| West of Scotland Coronary Prevention                  | Lancet       | 2007 | 348 | 9038 | 0 |
| West of Scotland Coronary Prevention                  | Lancet       | 2009 | 348 | 9038 | 0 |
| Windecker                                             | Lancet       | 2009 | 372 | 9644 | 0 |
| Yang Q et al                                          | Lancet       | 2002 | 359 | 9311 | 0 |
| Yang Q et al                                          | Lancet       | 2003 | 359 | 9311 | 0 |
| Yang Q et al                                          | Lancet       | 2004 | 359 | 9311 | 0 |
| Yokota                                                | Lancet       | 2008 | 371 | 9617 | 0 |
| Yusuf                                                 | Lancet       | 2005 | 366 | 9498 | 0 |
| Yusuf                                                 | Lancet       | 2006 | 366 | 9498 | 0 |
| Yusuf                                                 | Lancet       | 2007 | 366 | 9498 | 0 |
| Yusuf                                                 | Lancet       | 2008 | 366 | 9498 | 0 |
| 5-hydroxytryptamine-receptor antagonist               | Lancet Oncol | 2005 | 6   | 10   | 1 |
| 5-hydroxytryptamine-receptor antagonist               | Lancet Oncol | 2007 | 6   | 10   | 1 |
| Advances in oral therapy for multiple myeloma         | Lancet Oncol | 2006 | 7   | 4    | 1 |
| Antivascular therapy of cancer: DMXAA                 | Lancet Oncol | 2004 | 4   | 3    | 1 |
| Chemotherapy for epithelial ovarian cancer            | Lancet Oncol | 2003 | 3   | 9    | 1 |
| Chemotherapy for epithelial ovarian cancer            | Lancet Oncol | 2004 | 3   | 9    | 1 |
| CHOP-like chemotherapy plus rituximab                 | Lancet Oncol | 2006 | 7   | 5    | 1 |
| Clinical germline genetic testing for melanoma        | Lancet Oncol | 2004 | 5   | 5    | 1 |
| Clinical germline genetic testing for melanoma        | Lancet Oncol | 2005 | 5   | 5    | 1 |
| Comprehensive side-effect profile of aflibercept      | Lancet Oncol | 2006 | 7   | 8    | 1 |
| Comprehensive side-effect profile of aflibercept      | Lancet Oncol | 2007 | 7   | 8    | 1 |
| Current uses of isolated limb perfusion               | Lancet Oncol | 2003 | 4   | 7    | 1 |
| Cutaneous side-effects of kinase inhibitors           | Lancet Oncol | 2006 | 6   | 7    | 1 |
| Cyclo-oxygenase 2: a pharmacological target           | Lancet Oncol | 2002 | 2   | 9    | 1 |
| Effect of anastrozole and tamoxifen as adjuvant       | Lancet Oncol | 2007 | 9   | 1    | 1 |
| Effect of anastrozole and tamoxifen as adjuvant       | Lancet Oncol | 2008 | 9   | 1    | 1 |
| Effectiveness of switching from adjuvant tamoxifen    | Lancet Oncol | 2006 | 7   | 12   | 1 |
| Effects of radiotherapy with concomitant fluorouracil | Lancet Oncol | 2009 | 10  | 5    | 1 |
| Efficacy and safety of sorafenib in patients with     | Lancet Oncol | 2009 | 10  | 1    | 1 |
| Efficacy of azacitidine compared with cytarabine      | Lancet Oncol | 2009 | 10  | 3    | 1 |
| Fludarabine and mitoxantrone followed by              | Lancet Oncol | 2009 | 9   | 4    | 1 |
| Gastroenteropancreatic neuroendocrine tumours         | Lancet Oncol | 2008 | 9   | 1    | 1 |
| Increasing incidence of colorectal cancer             | Lancet Oncol | 2005 | 6   | 11   | 1 |
| Prophylactic quadrivalent human papillomavirus        | Lancet Oncol | 2005 | 6   | 5    | 1 |
| Safety and efficacy of sunitinib for metastatic       | Lancet Oncol | 2009 | 10  | 8    | 1 |
| Six versus eight cycles of bi-weekly docetaxel        | Lancet Oncol | 2008 | 9   | 2    | 1 |
| Skeletal effects of exemestane on bone mineral        | Lancet Oncol | 2007 | 8   | 2    | 1 |
| Skeletal effects of exemestane on bone mineral        | Lancet Oncol | 2008 | 8   | 2    | 1 |
| Surgery, brachytherapy, and external-beam             | Lancet Oncol | 2005 | 4   | 4    | 1 |
| Systematic review of taxane-containing regimens       | Lancet Oncol | 2004 | 5   | 6    | 1 |
| The Safety and Tolerability of low-dose               | Lancet Oncol | 2003 | 4   | 1    | 1 |
| Use of 70-gene signature to predict prognosis         | Lancet Oncol | 2008 | 8   | 12   | 1 |
| An immunohistochemical procedure to predict           | Lancet Oncol | 2009 | 10  | 8    | 0 |
| Cetuximab plus gemcitabine and cisplatin              | Lancet Oncol | 2007 | 9   | 1    | 0 |
| Cetuximab plus gemcitabine and cisplatin              | Lancet Oncol | 2008 | 9   | 1    | 0 |
| Chemotherapy for epithelial ovarian cancer—           |              |      |     |      |   |
| treatment of recurrent disease                        | Lancet Oncol | 2003 | 3   | 9    | 0 |

|                                                                                               |               |      |    |    |   |
|-----------------------------------------------------------------------------------------------|---------------|------|----|----|---|
| Chemotherapy for epithelial ovarian cancer—treatment of recurrent disease                     | Lancet Oncol  | 2004 | 3  | 9  | 0 |
| Circulating tumour cells as prognostic                                                        | Lancet Oncol  | 2009 | 10 | 3  | 0 |
| Clinical phenotypes and molecular gen                                                         | Lancet Oncol  | 2006 | 6  | 7  | 0 |
| Current and future developments in the use of temozolomide for the treatment of brain tumours |               |      |    |    |   |
| Eff ect of nitric-oxide synthesis on tum                                                      | Lancet Oncol  | 2007 | 8  | 2  | 0 |
| Eff ect of nitric-oxide synthesis on tum                                                      | Lancet Oncol  | 2008 | 8  | 2  | 0 |
| Emerging pathways in the developmer                                                           | Lancet Oncol  | 2003 | 4  | 1  | 0 |
| Environmental, genetic, and molecular                                                         | Lancet Oncol  | 2004 | 5  | 5  | 0 |
| Environmental, genetic, and molecular                                                         | Lancet Oncol  | 2005 | 5  | 5  | 0 |
| Fluorescence-guided surgery with 5-ar                                                         | Lancet Oncol  | 2006 | 7  | 5  | 0 |
| Gene copy number for epidermal grow                                                           | Lancet Oncol  | 2005 | 6  | 5  | 0 |
| Genetic predisposition to testicular ger                                                      | Lancet Oncol  | 2004 | 5  | 6  | 0 |
| Incidence and risk of hypertension wit                                                        | Lancet Oncol  | 2008 | 9  | 2  | 0 |
| Inflammatory response                                                                         | Lancet Oncol  | 2005 | 4  | 4  | 0 |
| Intrauterine factors and risk of breast                                                       | Lancet Oncol  | 2008 | 8  | 12 | 0 |
| Intrinsic markers of tumour hypoxia ai                                                        | Lancet Oncol  | 2009 | 9  | 4  | 0 |
| Left thoracoabdominal approach versu                                                          | Lancet Oncol  | 2006 | 7  | 8  | 0 |
| Left thoracoabdominal approach versu                                                          | Lancet Oncol  | 2007 | 7  | 8  | 0 |
| Lymphatic mapping in management of                                                            | Lancet Oncol  | 2005 | 6  | 11 | 0 |
| Management of terminal cancer in eld                                                          | Lancet Oncol  | 2004 | 4  | 3  | 0 |
| Plasma osteopontin, hypoxia, and res                                                          | Lancet Oncol  | 2005 | 6  | 10 | 0 |
| Plasma osteopontin, hypoxia, and res                                                          | Lancet Oncol  | 2007 | 6  | 10 | 0 |
| Predicting survival after liver transplar                                                     | Lancet Oncol  | 2009 | 10 | 1  | 0 |
| Radiation-related damage to dentition                                                         | Lancet Oncol  | 2006 | 7  | 4  | 0 |
| Sentinel-lymph-node biopsy as a stagi                                                         | Lancet Oncol  | 2006 | 7  | 12 | 0 |
| Standard-dose versus higher-dose pro                                                          | Lancet Oncol  | 2009 | 10 | 5  | 0 |
| Treatment strategy of limited surgery                                                         | Lancet Oncol  | 2003 | 4  | 7  | 0 |
| Venous thromboembolism in cervical c                                                          | Lancet Oncol  | 2008 | 9  | 1  | 0 |
| 250 mcg or 500 mcg interferon beta-1                                                          | Lancet Neurol | 2009 | 8  | 10 | 1 |
| Cessation versus continuation of 6-mo                                                         | Lancet Neurol | 2008 | 6  | 12 | 1 |
| Clarifying Lewy-body parkinsonism wit                                                         | Lancet Neurol | 2005 | 4  | 10 | 1 |
| Clinical interpretation and use of strok                                                      | Lancet Neurol | 2006 | 5  | 7  | 1 |
| Clinically important drug interactions i                                                      | Lancet Neurol | 2004 | 2  | 8  | 1 |
| Clinically important drug interactions i                                                      | Lancet Neurol | 2006 | 2  | 8  | 1 |
| Clinically important drug interactions i                                                      | Lancet Neurol | 2008 | 2  | 8  | 1 |
| Comparison of subcutaneous interfero                                                          | Lancet Neurol | 2008 | 7  | 10 | 1 |
| Comparison of subcutaneous interfero                                                          | Lancet Neurol | 2009 | 7  | 10 | 1 |
| Continuous dopamine-receptor treatm                                                           | Lancet Neurol | 2006 | 5  | 8  | 1 |
| CSF markers for incipient Alzheimer's                                                         | Lancet Neurol | 2004 | 2  | 10 | 1 |
| Effect of natalizumab on clinical and r                                                       | Lancet Neurol | 2009 | 8  | 3  | 1 |
| Efficacy of pramipexole and transderm                                                         | Lancet Neurol | 2007 | 6  | 6  | 1 |
| Entacapone in the treatment of Parkin                                                         | Lancet Neurol | 2005 | 4  | 6  | 1 |
| Evidence for use of glatiramer acetate                                                        | Lancet Neurol | 2005 | 4  | 2  | 1 |
| Glatiramer acetate in multiple sclerosis                                                      | Lancet Neurol | 2005 | 4  | 9  | 1 |
| Inflammation in Multiple Sclerosis: Th                                                        | Lancet Neurol | 2003 | 1  | 8  | 1 |
| Intravenous immune globulin (10% ca                                                           | Lancet Neurol | 2008 | 7  | 2  | 1 |
| Intravenous immune globulin (10% ca                                                           | Lancet Neurol | 2009 | 7  | 2  | 1 |

|                                                                                                                         |      |     |      |   |
|-------------------------------------------------------------------------------------------------------------------------|------|-----|------|---|
| Medium intensity oral anticoagulants v Lancet Ne                                                                        | 2007 | 6   | 2    | 1 |
| Memantine for the treatment of demer Lancet Ne                                                                          | 2003 | 2   | 8    | 1 |
| Memantine for the treatment of demer Lancet Ne                                                                          | 2004 | 2   | 8    | 1 |
| Miglustat for treatment of Niemann-Pi Lancet Ne                                                                         | 2007 | 6   | 9    | 1 |
| Natalizumab treatment for multiple scl Lancet Ne                                                                        | 2007 | 6   | 5    | 1 |
| Oestrogen and attacks of migraine wit Lancet Ne                                                                         | 2006 | 3   | 6    | 1 |
| Oestrogen and attacks of migraine wit Lancet Ne                                                                         | 2007 | 3   | 6    | 1 |
| Oestrogen and attacks of migraine wit Lancet Ne                                                                         | 2009 | 3   | 6    | 1 |
| REGARD: what can we learn from ranc Lancet Ne                                                                           | 2008 | 7   | 10   | 1 |
| Seizure versus syncope Lancet Ne                                                                                        | 2006 | 5   | 2    | 1 |
| The Global Stroke Initiative Lancet Ne                                                                                  | 2004 | 3   | 7    | 1 |
| Visual hallucinations in the diagnosis o Lancet Ne                                                                      | 2005 | 4   | 10   | 1 |
| Why did NMDA receptor antagonists fa Lancet Ne                                                                          | 2002 | 1   | 6    | 1 |
| Endovascular treatment with angiopla Lancet Ne                                                                          | 2009 | 8   | 10   | 0 |
| Effi cacy of minocycline in patients wit Lancet Ne                                                                      | 2008 | 6   | 12   | 0 |
| Functional MRI in multiple sclerosis: Lancet Ne                                                                         | 2005 | 4   | 10   | 0 |
| Seminar on choreas Lancet Ne                                                                                            | 2006 | 5   | 7    | 0 |
| Neuropeptides Lancet Ne                                                                                                 | 2004 | 2   | 8    | 0 |
| Neuropeptides Lancet Ne                                                                                                 | 2006 | 2   | 8    | 0 |
| Neuropeptides Lancet Ne                                                                                                 | 2008 | 2   | 8    | 0 |
| Results of the Stent-Protected Angiopl Lancet Ne                                                                        | 2008 | 7   | 10   | 0 |
| Results of the Stent-Protected Angiopl Lancet Ne                                                                        | 2009 | 7   | 10   | 0 |
| Neurological aspects of spinal-cord re Lancet Ne                                                                        | 2006 | 5   | 8    | 0 |
| Compulsive use of dopamine replacem Lancet Ne                                                                           | 2004 | 2   | 10   | 0 |
| Autologous non-myeloablative haemo Lancet Ne                                                                            | 2009 | 8   | 3    | 0 |
| Eff ect of rivastigmine on delay to dia Lancet Ne                                                                       | 2007 | 6   | 6    | 0 |
| Intake of vitamin E, vitamin C, and ca Lancet Ne                                                                        | 2005 | 4   | 6    | 0 |
| Prevention of in-hospital mortality afte Lancet Ne                                                                      | 2005 | 4   | 2    | 0 |
| Quality of life and its assessment in m Lancet Ne                                                                       | 2005 | 4   | 9    | 0 |
| Intravenous immunoglobulin for chronic inflammatory demyelinating polyradiculoneuropathy: a systematic review Lancet Ne | 2003 | 1   | 8    | 0 |
| Imaging of amyloid $\beta$ in Alzheimer's di Lancet Ne                                                                  | 2008 | 7   | 2    | 0 |
| Imaging of amyloid $\beta$ in Alzheimer's di Lancet Ne                                                                  | 2009 | 7   | 2    | 0 |
| Heritability of ischaemic stroke in worr Lancet Ne                                                                      | 2007 | 6   | 2    | 0 |
| Post-stroke plastic reorganisation in th Lancet Ne                                                                      | 2003 | 2   | 8    | 0 |
| Post-stroke plastic reorganisation in th Lancet Ne                                                                      | 2004 | 2   | 8    | 0 |
| Clinical features and viral serologies in Lancet Ne                                                                     | 2007 | 6   | 9    | 0 |
| Epilepsy in patients with brain tumour: Lancet Ne                                                                       | 2007 | 6   | 5    | 0 |
| An active and socially integrated lifest Lancet Ne                                                                      | 2006 | 3   | 6    | 0 |
| An active and socially integrated lifest Lancet Ne                                                                      | 2007 | 3   | 6    | 0 |
| An active and socially integrated lifest Lancet Ne                                                                      | 2009 | 3   | 6    | 0 |
| Stenting versus endarterectomy Lancet Ne                                                                                | 2008 | 7   | 10   | 0 |
| The measurement and clinical relevan Lancet Ne                                                                          | 2006 | 5   | 2    | 0 |
| Olfactory testing in parkinsonism Lancet Ne                                                                             | 2004 | 3   | 7    | 0 |
| Multiple sclerosis and birth order Lancet Ne                                                                            | 2005 | 4   | 10   | 0 |
| When should temporal-lobe epilepsy be treated surgically Lancet Ne                                                      | 2002 | 1   | 6    | 0 |
| 30 years' follow up of randomised stud BMJ                                                                              | 2006 | 330 | 7485 | 1 |

|                                          |     |      |     |       |   |
|------------------------------------------|-----|------|-----|-------|---|
| Acceptability of low molecular weight.   | BMJ | 2006 | 332 | 7541  | 1 |
| Accuracy of Cervico.                     | BMJ | 2008 | 325 | 7359  | 1 |
| Accuracy of reading liquid               | BMJ | 2007 | 335 | 7609  | 1 |
| Acute coronary syndromes without ST      | BMJ | 2008 | 334 | 7606  | 1 |
| Acute treatment of moderate              | BMJ | 2005 | 330 | 7490  | 1 |
| Acute treatment of moderate              | BMJ | 2007 | 330 | 7490  | 1 |
| Acute treatment of moderate              | BMJ | 2008 | 330 | 7490  | 1 |
| Angiotensin receptor blockers and myc    | BMJ | 2005 | 329 | 7477  | 1 |
| Antipsychotics for people with dement    | BMJ | 2008 | 337 | a602  | 1 |
| Are selective COX-2 inhibitors           | BMJ | 2002 | 324 | 7349  | 1 |
| Are selective COX-2 inhibitors           | BMJ | 2004 | 324 | 7349  | 1 |
| Assessment of independent.               | BMJ | 2002 | 325 | 7358  | 1 |
| Assessment of independent.               | BMJ | 2003 | 325 | 7358  | 1 |
| Association between change in high de    | BMJ | 2009 | 338 | b92   | 1 |
| B blockers for glaucoma and excess.      | BMJ | 2003 | 325 | 7377  | 1 |
| Blood pressure control by home monit     | BMJ | 2004 | 329 | 7458  | 1 |
| Botulinum toxin type A                   | BMJ | 2002 | 323 | 7313  | 1 |
| British Hypertension Society             | BMJ | 2004 | 328 | 7440  | 1 |
| Collaborative meta-analysis of rando     | BMJ | 2002 | 324 | 7329  | 1 |
| Collaborative meta-analysis of rando     | BMJ | 2007 | 324 | 7329  | 1 |
| Cost effectiveness of self monitoring    | BMJ | 2008 | 336 | 7654  | 1 |
| Diagnosis and management of neurop.      | BMJ | 2009 | 339 | b3002 | 1 |
| Diagnosis and treatment of chronic . . . | BMJ | 2007 | 332 | 7548  | 1 |
| Differences in outcomes of patients      | BMJ | 2005 | 330 | 7504  | 1 |
| Do selective cyclo-oxygenase             | BMJ | 2006 | 332 | 7553  | 1 |
| Do selective cyclo-oxygenase             | BMJ | 2007 | 332 | 7553  | 1 |
| Drug Points, Metabolic decompensatio     | BMJ | 2002 | 324 | 7348  | 1 |
| Drug Points, Metabolic decompensatio     | BMJ | 2003 | 324 | 7348  | 1 |
| Effect of a very low energy diet on      | BMJ | 2009 | 339 | b4609 | 1 |
| Effect of combinations of drugs on all   | BMJ | 2005 | 330 | 7499  | 1 |
| Effect of combinations of drugs on all   | BMJ | 2006 | 330 | 7499  | 1 |
| Effect on smoking quit rate of telling p | BMJ | 2009 | 336 | 7644  | 1 |
| Effectiveness of antipsychotic treatme   | BMJ | 2006 | 333 | 7561  | 1 |
| Effectiveness of antipsychotic treatme   | BMJ | 2007 | 333 | 7561  | 1 |
| Effectiveness of antipsychotic treatme   | BMJ | 2008 | 333 | 7561  | 1 |
| Effects of angiotensin converting enzy   | BMJ | 2005 | 329 | 7470  | 1 |
| Effects of prematurity                   | BMJ | 2003 | 306 | 6881  | 1 |
| Efficacy and safety of fonaparinux..     | BMJ | 2006 | 332 | 7537  | 1 |
| Efficacy and safety of fonaparinux..     | BMJ | 2007 | 332 | 7537  | 1 |
| Efficacy and safety of fonaparinux..     | BMJ | 2009 | 332 | 7537  | 1 |
| Efficacy and safety of galantamine in r  | BMJ | 2007 | 321 | 7274  | 1 |
| Efficacy, tolerability, and upper gastro | BMJ | 2002 | 325 | 7365  | 1 |
| Efficacy, tolerability, and upper gastro | BMJ | 2003 | 325 | 7365  | 1 |
| Efficacy, tolerability, and upper gastro | BMJ | 2005 | 325 | 7365  | 1 |
| Fall prevention with supplemental and    | BMJ | 2009 | 339 | b3692 | 1 |
| Fatal dysnatraemia caused by.            | BMJ | 2003 | 326 | 7385  | 1 |
| Fusidic acid cream in the treatment..    | BMJ | 2002 | 324 | 7331  | 1 |
| Happiness, social networks and health    | BMJ | 2009 | 337 | a2781 | 1 |
| Impact of the MTHFR C677T                | BMJ | 2004 | 328 | 7455  | 1 |
| Impact of the MTHFR C677T                | BMJ | 2006 | 328 | 7455  | 1 |
| Inhaled glucocorticoides versus          | BMJ | 2003 | 326 | 7390  | 1 |
| Inhaled glucocorticoides versus          | BMJ | 2004 | 326 | 7390  | 1 |

|                                          |     |      |     |       |   |
|------------------------------------------|-----|------|-----|-------|---|
| Iron supplementation for unexplained     | BMJ | 2003 | 326 | 7399  | 1 |
| Monoamine oxidase type B                 | BMJ | 2006 | 329 | 7466  | 1 |
| Montelukast and fluticasone              | BMJ | 2003 | 327 | 7420  | 1 |
| Montelukast and fluticasone              | BMJ | 2004 | 327 | 7420  | 1 |
| Montelukast and fluticasone              | BMJ | 2007 | 327 | 7420  | 1 |
| New point of care.                       | BMJ | 2008 | 335 | 7631  | 1 |
| Newer agents for blood glucose contro    | BMJ | 2009 | 338 | b1668 | 1 |
| No cure, no pay                          | BMJ | 2005 | 330 | 7502  | 1 |
| Non-absorbable disaccharides for hepæ    | BMJ | 2005 | 328 | 7447  | 1 |
| Observational study of upper gastroint   | BMJ | 2002 | 325 | 7365  | 1 |
| Observational study of upper gastroint   | BMJ | 2003 | 325 | 7365  | 1 |
| Observational study of upper gastroint   | BMJ | 2004 | 325 | 7365  | 1 |
| Observational study of upper gastroint   | BMJ | 2005 | 325 | 7365  | 1 |
| Omega 3 fatty acids and cardiovasculæ    | BMJ | 2004 | 328 | 7430  | 1 |
| Paracetamol plus ibuprofen for the tre.  | BMJ | 2009 | 337 | a1302 | 1 |
| Performance evaluation of a new rapid    | BMJ | 2009 | 339 | b2955 | 1 |
| Pregnancy outcome in women before        | BMJ | 2008 | 337 | a1343 | 1 |
| Preventing fractures in elderly          | BMJ | 2004 | 327 | 7406  | 1 |
| Probiotics for treatment of acute.       | BMJ | 2007 | 335 | 7615  | 1 |
| Probiotics in prevention of antibiotic   | BMJ | 2004 | 324 | 7350  | 1 |
| Probiotics in prevention of antibiotic   | BMJ | 2005 | 324 | 7350  | 1 |
| Probiotics in prevention of antibiotic   | BMJ | 2006 | 324 | 7350  | 1 |
| Probiotics in prevention of antibiotic   | BMJ | 2007 | 324 | 7350  | 1 |
| Quantifying effect of statins on low.    | BMJ | 2003 | 326 | 7404  | 1 |
| Quantifying effect of statins on low.    | BMJ | 2004 | 326 | 7404  | 1 |
| Quantifying effect of statins on low.    | BMJ | 2005 | 326 | 7404  | 1 |
| Quantifying effect of statins on low.    | BMJ | 2006 | 326 | 7404  | 1 |
| Quantifying effect of statins on low.    | BMJ | 2007 | 326 | 7404  | 1 |
| Quantifying effect of statins on low.    | BMJ | 2009 | 326 | 7404  | 1 |
| Quetiapine and rivastigamine             | BMJ | 2005 | 330 | 7496  | 1 |
| Randomised crossover trial of transder   | BMJ | 2002 | 322 | 7295  | 1 |
| Randomised crossover trial of transder   | BMJ | 2003 | 322 | 7295  | 1 |
| Randomised double blind trial of etoric  | BMJ | 2006 | 324 | 7352  | 1 |
| Randomized controlled trial for dual     | BMJ | 2008 | 321 | 7274  | 1 |
| Recent development in inhaled.           | BMJ | 2005 | 330 | 7492  | 1 |
| Recent development in inhaled.           | BMJ | 2006 | 330 | 7492  | 1 |
| Recent development in inhaled.           | BMJ | 2007 | 330 | 7492  | 1 |
| Reduction of bloodstream infections      | BMJ | 2007 | 334 | 7589  | 1 |
| Risk factors for coronary                | BMJ | 2002 | 316 | 7134  | 1 |
| Risk factors for coronary                | BMJ | 2003 | 316 | 7134  | 1 |
| Risk factors for coronary                | BMJ | 2004 | 316 | 7134  | 1 |
| Risk factors for coronary                | BMJ | 2005 | 316 | 7134  | 1 |
| Risk of cardiovascular disease and all ( | BMJ | 2009 | 339 | b4731 | 1 |
| Risk of myocardial infarction in patient | BMJ | 2005 | 330 | 7504  | 1 |
| Risk of myocardial infarction in patient | BMJ | 2006 | 330 | 7504  | 1 |
| Risk of myocardial infarction in patient | BMJ | 2008 | 330 | 7504  | 1 |
| Risk of myocardial infarction in patient | BMJ | 2009 | 330 | 7504  | 1 |
| Soft drinks, fructose consumption        | BMJ | 2008 | 336 | 7639  | 1 |
| Tacrolimus versus                        | BMJ | 2006 | 331 | 7520  | 1 |
| Tight blood pressure control..           | BMJ | 2002 | 317 | 7160  | 1 |
| Treatment if menorrhagia during..        | BMJ | 2007 | 313 | 7057  | 1 |
| Treatment of head louse infectation wi   | BMJ | 2006 | 330 | 7505  | 1 |

|                                          |     |      |     |       |   |
|------------------------------------------|-----|------|-----|-------|---|
| Use of probiotic Lactobacillus preparat  | BMJ | 2008 | 335 | 7610  | 1 |
| Use of probiotic Lactobacillus preparat  | BMJ | 2009 | 335 | 7610  | 1 |
| Use of ramipril in preventing stroke     | BMJ | 2002 | 324 | 7339  | 1 |
| Use of ramipril in preventing stroke     | BMJ | 2004 | 324 | 7339  | 1 |
| Use of ramipril in preventing stroke     | BMJ | 2006 | 324 | 7339  | 1 |
| Using a combination inhaler              | BMJ | 2007 | 335 | 7618  | 1 |
| Using a combination inhaler              | BMJ | 2008 | 335 | 7618  | 1 |
| Using a combination inhaler              | BMJ | 2009 | 335 | 7618  | 1 |
| Varenicline and suicidal behavior        | BMJ | 2009 | 339 | b3805 | 1 |
| A strategy to reduce cardiovascular dis  | BMJ | 2003 | 326 | 7404  | 0 |
| A strategy to reduce cardiovascular dis  | BMJ | 2004 | 326 | 7404  | 0 |
| A strategy to reduce cardiovascular dis  | BMJ | 2005 | 326 | 7404  | 0 |
| A strategy to reduce cardiovascular dis  | BMJ | 2006 | 326 | 7404  | 0 |
| A strategy to reduce cardiovascular dis  | BMJ | 2007 | 326 | 7404  | 0 |
| A strategy to reduce cardiovascular dis  | BMJ | 2009 | 326 | 7404  | 0 |
| Accumulation of prion protein in tonsil  | BMJ | 2002 | 325 | 7365  | 0 |
| Accumulation of prion protein in tonsil  | BMJ | 2003 | 325 | 7365  | 0 |
| Accumulation of prion protein in tonsil  | BMJ | 2005 | 325 | 7365  | 0 |
| Accuracy of liquid based versus convey   | BMJ | 2007 | 335 | 7609  | 0 |
| Adequacy and reporting of allocation c   | BMJ | 2005 | 330 | 7499  | 0 |
| Adequacy and reporting of allocation c   | BMJ | 2006 | 330 | 7499  | 0 |
| An evaluation of the multidisciplinary a | BMJ | 2003 | 306 | 6881  | 0 |
| Assessing the promise of user involve    | BMJ | 2008 | 336 | 7639  | 0 |
| Association between depression and ai    | BMJ | 2004 | 328 | 7440  | 0 |
| Breast cancer mortality in Copenhagen    | BMJ | 2006 | 330 | 7485  | 0 |
| Brief intervention during hospital admi  | BMJ | 2002 | 324 | 7329  | 0 |
| Brief intervention during hospital admi  | BMJ | 2007 | 324 | 7329  | 0 |
| Cardiac outcomes in a cohort of adult    | BMJ | 2009 | 339 | b4731 | 0 |
| Category of exposure to HIV and age i    | BMJ | 2007 | 313 | 7057  | 0 |
| Central overweight and obesity in Briti  | BMJ | 2003 | 326 | 7390  | 0 |
| Central overweight and obesity in Briti  | BMJ | 2004 | 326 | 7390  | 0 |
| Commentary: Socially or materially m.    | BMJ | 2006 | 332 | 7553  | 0 |
| Commentary: Socially or materially m.    | BMJ | 2007 | 332 | 7553  | 0 |
| Comparison of direct and indirect metl   | BMJ | 2009 | 339 | b2955 | 0 |
| Comparison of laparoscopic and mini ii   | BMJ | 2006 | 333 | 7561  | 0 |
| Comparison of laparoscopic and mini ii   | BMJ | 2007 | 333 | 7561  | 0 |
| Comparison of laparoscopic and mini ii   | BMJ | 2008 | 333 | 7561  | 0 |
| Conservative management of persiste      | BMJ | 2002 | 323 | 7313  | 0 |
| Correct use of the Apgar score for resu  | BMJ | 2004 | 329 | 7458  | 0 |
| Cost effectiveness of nurse delivered €  | BMJ | 2009 | 338 | b92   | 0 |
| Country of training and ethnic origin o  | BMJ | 2006 | 329 | 7466  | 0 |
| Diagnostic evaluation of people with h   | BMJ | 2009 | 337 | a1302 | 0 |
| Diagnostic scope of and exposure to p    | BMJ | 2008 | 334 | 7606  | 0 |
| Does dietary folate intake modify effec  | BMJ | 2006 | 331 | 7520  | 0 |
| Effect of hepatitis B immunisation in n  | BMJ | 2006 | 332 | 7537  | 0 |
| Effect of hepatitis B immunisation in n  | BMJ | 2007 | 332 | 7537  | 0 |
| Effect of hepatitis B immunisation in n  | BMJ | 2009 | 332 | 7537  | 0 |
| Effect of routine zinc supplementation   | BMJ | 2004 | 324 | 7350  | 0 |
| Effect of routine zinc supplementation   | BMJ | 2005 | 324 | 7350  | 0 |
| Effect of routine zinc supplementation   | BMJ | 2006 | 324 | 7350  | 0 |
| Effect of routine zinc supplementation   | BMJ | 2007 | 324 | 7350  | 0 |
| Effect on endometrium of long term tr    | BMJ | 2002 | 325 | 7358  | 0 |

|                                                                                                                        |     |      |     |       |   |
|------------------------------------------------------------------------------------------------------------------------|-----|------|-----|-------|---|
| Effect on endometrium of long term tr                                                                                  | BMJ | 2003 | 325 | 7358  | 0 |
| Effects of the Heartbeat Wales prograr                                                                                 | BMJ | 2002 | 316 | 7134  | 0 |
| Effects of the Heartbeat Wales prograr                                                                                 | BMJ | 2003 | 316 | 7134  | 0 |
| Effects of the Heartbeat Wales prograr                                                                                 | BMJ | 2004 | 316 | 7134  | 0 |
| Effects of the Heartbeat Wales prograr                                                                                 | BMJ | 2005 | 316 | 7134  | 0 |
| Efficacy of atenolol and captopril in rec                                                                              | BMJ | 2002 | 317 | 7160  | 0 |
| Efficacy of self monitoring of blood glu                                                                               | BMJ | 2008 | 336 | 7654  | 0 |
| Euthanasia and other end of life decisi                                                                                | BMJ | 2009 | 339 | b3002 | 0 |
| General practitioners' reasons for rem                                                                                 | BMJ | 2002 | 322 | 7295  | 0 |
| General practitioners' reasons for rem                                                                                 | BMJ | 2003 | 322 | 7295  | 0 |
| Genetic engineering in athletes                                                                                        | BMJ | 2008 | 337 | a602  | 0 |
| Implementation of the Canadian C-Spi                                                                                   | BMJ | 2009 | 339 | b3805 | 0 |
| Improving tuberculosis control through                                                                                 | BMJ | 2006 | 332 | 7541  | 0 |
| Injury to the eye                                                                                                      | BMJ | 2004 | 328 | 7430  | 0 |
| Investigating suspected anaemia                                                                                        | BMJ | 2009 | 338 | b1668 | 0 |
| Is there a north-south divide in social                                                                                | BMJ | 2005 | 328 | 7447  | 0 |
| Leishmaniasis                                                                                                          | BMJ | 2003 | 326 | 7385  | 0 |
| Long term pharmacotherapy for obesit                                                                                   | BMJ | 2008 | 335 | 7631  | 0 |
| Long term results of compression ther                                                                                  | BMJ | 2008 | 335 | 7610  | 0 |
| Long term results of compression ther                                                                                  | BMJ | 2009 | 335 | 7610  | 0 |
| Mental disorders in prison populations                                                                                 | BMJ | 2005 | 330 | 7504  | 0 |
| Mental disorders in prison populations                                                                                 | BMJ | 2006 | 330 | 7504  | 0 |
| Mental disorders in prison populations                                                                                 | BMJ | 2008 | 330 | 7504  | 0 |
| Mental disorders in prison populations                                                                                 | BMJ | 2009 | 330 | 7504  | 0 |
| Metformin, heart failure, and lactic aci                                                                               | BMJ | 2007 | 335 | 7618  | 0 |
| Metformin, heart failure, and lactic aci                                                                               | BMJ | 2008 | 335 | 7618  | 0 |
| Metformin, heart failure, and lactic aci                                                                               | BMJ | 2009 | 335 | 7618  | 0 |
| Monitoring in chronic disease: a ration                                                                                | BMJ | 2005 | 330 | 7492  | 0 |
| Monitoring in chronic disease: a ration                                                                                | BMJ | 2006 | 330 | 7492  | 0 |
| Monitoring in chronic disease: a ration                                                                                | BMJ | 2007 | 330 | 7492  | 0 |
| Mortality data in adult cardiac surgery                                                                                | BMJ | 2005 | 330 | 7490  | 0 |
| Mortality data in adult cardiac surgery                                                                                | BMJ | 2007 | 330 | 7490  | 0 |
| Mortality data in adult cardiac surgery                                                                                | BMJ | 2008 | 330 | 7490  | 0 |
| Neuraminidase inhibitors for preventin                                                                                 | BMJ | 2009 | 339 | b4609 | 0 |
| Offending in psychiatric patients after<br>discharge from<br>medium secure units: prospective<br>national cohort study | BMJ | 2004 | 328 | 7455  | 0 |
| Offending in psychiatric patients after<br>discharge from<br>medium secure units: prospective<br>national cohort study | BMJ | 2006 | 328 | 7455  | 0 |
| Partial protection of seasonal trivalent                                                                               | BMJ | 2009 | 339 | b3692 | 0 |
| Participation in screening for cardiovas                                                                               | BMJ | 2003 | 326 | 7399  | 0 |
| Patients, professionalism, and revalida                                                                                | BMJ | 2005 | 330 | 7502  | 0 |
| Patterns in current perioperative pract                                                                                | BMJ | 2006 | 330 | 7505  | 0 |
| Perinatal mortality and other severe a                                                                                 | BMJ | 2008 | 337 | a1343 | 0 |
| Physical activity cost of the school run                                                                               | BMJ | 2005 | 329 | 7470  | 0 |
| Postpartum splinting of ear deformitie:                                                                                | BMJ | 2007 | 334 | 7589  | 0 |
| Potential alternatives to COX 2 inhibitc                                                                               | BMJ | 2002 | 324 | 7349  | 0 |
| Potential alternatives to COX 2 inhibitc                                                                               | BMJ | 2004 | 324 | 7349  | 0 |
| Predicting the "strugglers"                                                                                            | BMJ | 2007 | 332 | 7548  | 0 |

|                                                       |      |     |      |   |
|-------------------------------------------------------|------|-----|------|---|
| Prevalence of morbidity associated with BMJ           | 2002 | 324 | 7348 | 0 |
| Prevalence of morbidity associated with BMJ           | 2003 | 324 | 7348 | 0 |
| Problem solving treatment and group BMJ               | 2007 | 321 | 7274 | 0 |
| Prognosis of angina with and without BMJ              | 2003 | 327 | 7420 | 0 |
| Prognosis of angina with and without BMJ              | 2004 | 327 | 7420 | 0 |
| Prognosis of angina with and without BMJ              | 2007 | 327 | 7420 | 0 |
| Relation between burden of disease and BMJ            | 2002 | 324 | 7339 | 0 |
| Relation between burden of disease and BMJ            | 2004 | 324 | 7339 | 0 |
| Relation between burden of disease and BMJ            | 2006 | 324 | 7339 | 0 |
| Role of multivitamins and mineral supplements BMJ     | 2005 | 330 | 7496 | 0 |
| Routine vaccinations and child survival BMJ           | 2008 | 321 | 7274 | 0 |
| Sleep attacks in patients taking dopamine BMJ         | 2006 | 324 | 7352 | 0 |
| Supplementation with antioxidants and BMJ             | 2009 | 336 | 7644 | 0 |
| Suturing versus conservative management BMJ           | 2008 | 325 | 7359 | 0 |
| Systematic review of long term effects BMJ            | 2002 | 325 | 7365 | 0 |
| Systematic review of long term effects BMJ            | 2003 | 325 | 7365 | 0 |
| Systematic review of long term effects BMJ            | 2004 | 325 | 7365 | 0 |
| Systematic review of long term effects BMJ            | 2005 | 325 | 7365 | 0 |
| The rational clinical examination in emergency BMJ    | 2009 | 337 | 7281 | 0 |
| The white paper on public health BMJ                  | 2005 | 329 | 7477 | 0 |
| Time trends in survival and readmission BMJ           | 2002 | 324 | 7331 | 0 |
| Use of intensive case management to BMJ               | 2007 | 335 | 7615 | 0 |
| Use of waist circumference to predict BMJ             | 2005 | 330 | 7504 | 0 |
| Wegener's granulomatosis presenting BMJ               | 2004 | 327 | 7406 | 0 |
| Young women's accounts of factors influencing BMJ     | 2003 | 325 | 7377 | 0 |
| A randomised controlled trial evaluating Gut          | 2009 | 46  | 6    | 1 |
| A randomised controlled trial. Gut                    | 2006 | 53  | 11   | 1 |
| A randomised, double blind.. Gut                      | 2004 | 50  | 6    | 1 |
| A simple method for assessing intestinal Gut          | 2003 | 47  | 4    | 1 |
| Adalimumab for maintenance Gut                        | 2008 | 56  | 9    | 1 |
| Adalimumab for maintenance treatment Gut              | 2009 | 56  | 9    | 1 |
| Adalimumab for maintenance treatment Gut              | 2007 | 56  | 9    | 1 |
| Adalimumab for the treatment of fistula Gut           | 2009 | 58  | 7    | 1 |
| An Asia-Pacific, double blind, placebo controlled Gut | 2003 | 52  | 5    | 1 |
| An Asia-Pacific, double blind. Gut                    | 2004 | 52  | 5    | 1 |
| Channelling bias and the incidence.. Gut              | 2006 | 52  | 9    | 1 |
| Channelling bias and the incidence Gut                | 2004 | 52  | 9    | 1 |
| Channelling bias and the incidence of.. Gut           | 2003 | 52  | 9    | 1 |
| Channelling bias and the incidence. Gut               | 2005 | 52  | 9    | 1 |
| Clinical presentation, diagnosis Gut                  | 2008 | 56  | 1    | 1 |
| Clinical presentation, diagnosis and local Gut        | 2007 | 56  | 1    | 1 |
| Combined oral and enema treatment versus Gut          | 2007 | 54  | 7    | 1 |
| Combined oral and enema treatment.. Gut               | 2005 | 54  | 7    | 1 |
| Comparison of a low dose polyethylene glycol Gut      | 2006 | 44  | 2    | 1 |
| Comparison of a low dose polyethylene glycol Gut      | 2003 | 44  | 2    | 1 |
| Comparison of a low dose polyethylene glycol Gut      | 2007 | 44  | 2    | 1 |
| Cost effectiveness of peginterferon Gut               | 2003 | 52  | 3    | 1 |
| Cost of illness Gut                                   | 2008 | 53  | 10   | 1 |
| Cure of Helicobacter pylori infection in Gut          | 2004 | 53  | 1    | 1 |
| Current concepts in the management of Gut             | 2007 | 56  | 6    | 1 |
| Diagnosing small bowel Crohn's disease Gut            | 2003 | 52  | 10   | 1 |
| Echo-enhanced ultrasound: a new validation Gut        | 2005 | 55  | 1    | 1 |

|                                           |     |      |    |    |   |
|-------------------------------------------|-----|------|----|----|---|
| Effect of a protein and energy dense      | Gut | 2004 | 52 | 10 | 1 |
| Effect of a protein and energy dense n    | Gut | 2003 | 52 | 10 | 1 |
| Erosive oesophagitis: outcome of repe     | Gut | 2002 | 43 | 4  | 1 |
| Food induced stimulation of the.          | Gut | 2002 | 46 | 6  | 1 |
| Frequency of glucocorticoid               | Gut | 2005 | 35 | 3  | 1 |
| Frequency of glucocorticoid resistance    | Gut | 2004 | 35 | 3  | 1 |
| Frequency of glucocorticoid resistance    | Gut | 2009 | 35 | 3  | 1 |
| Frequency of glucocorticoid.              | Gut | 2006 | 35 | 3  | 1 |
| High level perinuclear antineutrophil c   | Gut | 2003 | 49 | 5  | 1 |
| Increased mucosal tumor necrosis..        | Gut | 2003 | 51 | 5  | 1 |
| Increased mucosal tumour necrosis fa      | Gut | 2004 | 51 | 5  | 1 |
| Increased mucosal tumour necrosis.        | Gut | 2005 | 51 | 5  | 1 |
| Increased mucosal tumour necrosis..       | Gut | 2006 | 51 | 5  | 1 |
| Infliximab for the treatment of pyoder    | Gut | 2007 | 55 | 4  | 1 |
| Iron, anaemia, and inflammatory bowe      | Gut | 2006 | 53 | 8  | 1 |
| Isolation of peptides useful for differer | Gut | 2003 | 52 | 4  | 1 |
| Lactobacillus acidophilus (strain LB)     | Gut | 2002 | 50 | 6  | 1 |
| Long-term safety of infliximab for the    | Gut | 2009 | 58 | 4  | 1 |
| Low dose balsalazide                      | Gut | 2007 | 49 | 6  | 1 |
| Marker antibody expression                | Gut | 2004 | 47 | 4  | 1 |
| Marker antibody expression stratifies (   | Gut | 2003 | 47 | 4  | 1 |
| Mutations in pattern recongnition         | Gut | 2007 | 56 | 11 | 1 |
| Neutrophil derived human S100A12          | Gut | 2006 | 52 | 6  | 1 |
| New serological markers in inflammatc     | Gut | 2007 | 56 | 10 | 1 |
| NORCCAP (Norwegian colorectal can         | Gut | 2009 | 50 | 5  | 1 |
| Once daily high dose probiotic therapy    | Gut | 2004 | 53 | 1  | 1 |
| Once daily versus three times daily       | Gut | 2009 | 58 | 2  | 1 |
| Oral budesonide as effective.             | Gut | 2008 | 41 | 2  | 1 |
| Oral budesonide is a..                    | Gut | 2005 | 41 | 2  | 1 |
| Oral budesonide is as effective           | Gut | 2007 | 41 | 2  | 1 |
| Oral Budesonide is as.                    | Gut | 2004 | 41 | 2  | 1 |
| Predicting response to peginterferon      | Gut | 2007 | 56 | 5  | 1 |
| Predicting response to peginterferon..    | Gut | 2008 | 56 | 5  | 1 |
| Prognostic determinants for chronic.      | Gut | 2005 | 54 | 11 | 1 |
| Prucalopride (Resolor) in the treatmen    | Gut | 2009 | 58 | 3  | 1 |
| Randomised trial of once or twice         | Gut | 2009 | 57 | 7  | 1 |
| Randomised trial of once or twice daily   | Gut | 2008 | 57 | 7  | 1 |
| Report of the working party of the end    | Gut | 2003 | 42 | 2  | 1 |
| Report of the working party..             | Gut | 2004 | 42 | 2  | 1 |
| Suppression of haematopoiesis during      | Gut | 2005 | 54 | 7  | 1 |
| The feasibility of wireless capsule       | Gut | 2009 | 58 | 11 | 1 |
| Therapy Update: Which 5-ASA               | Gut | 2005 | 51 | 4  | 1 |
| Use of mesalazine slow release suppos     | Gut | 2003 | 42 | 2  | 1 |
| A randomised controlled trial of high v   | Gut | 2007 | 49 | 6  | 0 |
| A randomised, controlled, double blind    | Gut | 2006 | 53 | 11 | 0 |
| Aberrant p16INK4A and DPC4/Smad4          | Gut | 2004 | 50 | 6  | 0 |
| Absorption of calcium and magnesium       | Gut | 2009 | 46 | 6  | 0 |
| Adenovirus-mediated expression of BM      | Gut | 2007 | 56 | 5  | 0 |
| Adenovirus-mediated expression of BM      | Gut | 2008 | 56 | 5  | 0 |
| Age and Helicobacter pylori decrease ç    | Gut | 2002 | 43 | 4  | 0 |
| Analysis of the IBD5 locus and potenti    | Gut | 2003 | 52 | 4  | 0 |
| Assessment of meal induced gastric ac     | Gut | 2006 | 52 | 9  | 0 |

|                                           |     |      |    |    |   |
|-------------------------------------------|-----|------|----|----|---|
| Assessment of meal induced gastric ac     | Gut | 2004 | 52 | 9  | 0 |
| Assessment of meal induced gastric ac     | Gut | 2003 | 52 | 9  | 0 |
| Assessment of meal induced gastric ac     | Gut | 2005 | 52 | 9  | 0 |
| Bone mineral density and nutritional s    | Gut | 2003 | 42 | 2  | 0 |
| Brain imaging and functional gastroint    | Gut | 2006 | 53 | 8  | 0 |
| Carbonylation and disassembly of the      | Gut | 2002 | 46 | 6  | 0 |
| Card15 gene overexpression in monon       | Gut | 2006 | 52 | 6  | 0 |
| Cholestasis protects the liver from iscl  | Gut | 2008 | 56 | 1  | 0 |
| Cholestasis protects the liver from iscl  | Gut | 2007 | 56 | 1  | 0 |
| Comparison of CT colonography, colon      | Gut | 2009 | 58 | 2  | 0 |
| Concurrent infection with Schistosoma     | Gut | 2004 | 53 | 1  | 0 |
| Contrast enhanced magnetic resonanc       | Gut | 2003 | 52 | 10 | 0 |
| Controlled trial of anti-tuberculous che  | Gut | 2005 | 35 | 3  | 0 |
| Controlled trial of anti-tuberculous che  | Gut | 2004 | 35 | 3  | 0 |
| Controlled trial of anti-tuberculous che  | Gut | 2009 | 35 | 3  | 0 |
| Controlled trial of anti-tuberculous che  | Gut | 2006 | 35 | 3  | 0 |
| Crohn's disease: increased mortality 1    | Gut | 2007 | 55 | 4  | 0 |
| Durability of HBeAg seroconversion fol    | Gut | 2003 | 52 | 3  | 0 |
| Elevated plasma osteopontin associate     | Gut | 2007 | 56 | 6  | 0 |
| Energy expenditure and body composi       | Gut | 2008 | 41 | 2  | 0 |
| Energy expenditure and body composi       | Gut | 2005 | 41 | 2  | 0 |
| Energy expenditure and body composi       | Gut | 2007 | 41 | 2  | 0 |
| Energy expenditure and body composi       | Gut | 2004 | 41 | 2  | 0 |
| Flares in chronic hepatitis B patients ir | Gut | 2005 | 54 | 11 | 0 |
| Flat and depressed colorectal tumours     | Gut | 2005 | 51 | 4  | 0 |
| Human adult stem cells derived from ε     | Gut | 2009 | 58 | 7  | 0 |
| Impairment of mitochondrial acetoace      | Gut | 2007 | 56 | 11 | 0 |
| Increased incidence of non-Hodgkin's l    | Gut | 2003 | 47 | 4  | 0 |
| Increased platelet depleted plasma 5-I    | Gut | 2003 | 52 | 5  | 0 |
| Increased platelet depleted plasma 5-I    | Gut | 2004 | 52 | 5  | 0 |
| Influence of dietary factors on the clin  | Gut | 2008 | 53 | 10 | 0 |
| Interleukin 18 is a primary mediator o    | Gut | 2002 | 50 | 6  | 0 |
| KITENIN recruits Dishevelled/PKCδ to      | Gut | 2009 | 58 | 4  | 0 |
| Macromolecular transport across the r.    | Gut | 2006 | 44 | 2  | 0 |
| Macromolecular transport across the r.    | Gut | 2003 | 44 | 2  | 0 |
| Macromolecular transport across the r.    | Gut | 2007 | 44 | 2  | 0 |
| Measurement of thiopurine methyltran      | Gut | 2003 | 49 | 5  | 0 |
| Nodular regenerative hyperplasia in pε    | Gut | 2007 | 56 | 10 | 0 |
| Oesophageal clearance of acid and bile    | Gut | 2004 | 53 | 1  | 0 |
| PCR detection of Mycobacterium parat      | Gut | 2003 | 51 | 5  | 0 |
| PCR detection of Mycobacterium parat      | Gut | 2004 | 51 | 5  | 0 |
| PCR detection of Mycobacterium parat      | Gut | 2005 | 51 | 5  | 0 |
| PCR detection of Mycobacterium parat      | Gut | 2006 | 51 | 5  | 0 |
| Perceptual responses in patients with i   | Gut | 2004 | 47 | 4  | 0 |
| Perceptual responses in patients with i   | Gut | 2003 | 47 | 4  | 0 |
| Phosphatidylinositol 3-kinase mediate     | Gut | 2004 | 52 | 10 | 0 |
| Phosphatidylinositol 3-kinase mediate     | Gut | 2003 | 52 | 10 | 0 |
| Psychological stress induces eosinophi    | Gut | 2009 | 58 | 11 | 0 |
| Reduced α-defensin expression is asso     | Gut | 2009 | 57 | 7  | 0 |
| Reduced α-defensin expression is asso     | Gut | 2008 | 57 | 7  | 0 |
| Reduced mucosal antimicrobial activity    | Gut | 2008 | 56 | 9  | 0 |
| Reduced mucosal antimicrobial activity    | Gut | 2009 | 56 | 9  | 0 |

|                                           |       |      |    |    |   |
|-------------------------------------------|-------|------|----|----|---|
| Reduced mucosal antimicrobial activity    | Gut   | 2007 | 56 | 9  | 0 |
| Response to interferon alfa is hepatitis  | Gut   | 2005 | 54 | 7  | 0 |
| Retarded release phosphatidylcholine I    | Gut   | 2007 | 54 | 7  | 0 |
| Retarded release phosphatidylcholine I    | Gut   | 2005 | 54 | 7  | 0 |
| Stress protein response in human oes      | Gut   | 2003 | 42 | 2  | 0 |
| Stress protein response in human oes      | Gut   | 2004 | 42 | 2  | 0 |
| Vitamin A inhibits pancreatic stellate c  | Gut   | 2005 | 55 | 1  | 0 |
| Water-soluble CO-releasing molecules      | Gut   | 2009 | 58 | 3  | 0 |
| You get what you expect? A critical ap    | Gut   | 2009 | 50 | 5  | 0 |
| Need for large scale randomised..         | Heart | 2002 | 84 | 4  | 1 |
| Perindopril improves six minute walkin    | Heart | 2002 | 88 | 4  | 1 |
| Treatment of chronic heart failure with   | Heart | 2003 | 89 | 3  | 1 |
| N-terminal pro B type.                    | Heart | 2003 | 89 | 8  | 1 |
| N-terminal pro B type natriuretic.        | Heart | 2004 | 89 | 8  | 1 |
| Cost effectiveness of extended treatm     | Heart | 2003 | 89 | 3  | 1 |
| Low prevalence of lipid lowering drugs    | Heart | 2003 | 88 | 1  | 1 |
| Body surface mapping improves early.      | Heart | 2003 | 89 | 9  | 1 |
| Summary of recommendations on per         | Heart | 2004 | 90 | 6  | 1 |
| Impact of Nicorandil in Angina            | Heart | 2004 | 90 | 12 | 1 |
| Impact of Nicorandil in Angina            | Heart | 2006 | 90 | 12 | 1 |
| Beneficial effects of fluvastatin..       | Heart | 2005 | 90 | 10 | 1 |
| Irbesartan significantly reduces..        | Heart | 2005 | 91 | 5  | 1 |
| Three dimensional segmented myocar        | Heart | 2005 | 91 | 10 | 1 |
| An omega-3 polyunsaturated fatty aci      | Heart | 2006 | 85 | 5  | 1 |
| An omega-3 polyunsaturated fatty aci      | Heart | 2007 | 85 | 5  | 1 |
| Systemic aclerosis associated pulmona     | Heart | 2006 | 92 | 7  | 1 |
| Systemic aclerosis associated pulmona     | Heart | 2007 | 92 | 7  | 1 |
| Beneficial effects of abciximab           | Heart | 2006 | 92 | 10 | 1 |
| Time to treatment and the impact.         | Heart | 2006 | 91 | 11 | 1 |
| Compliance with and effectiveness to      | Heart | 2006 | 92 | 3  | 1 |
| Compliance with and effectiveness to      | Heart | 2007 | 92 | 3  | 1 |
| Compliance with and effectiveness to      | Heart | 2008 | 92 | 3  | 1 |
| Magnitude and consequences.               | Heart | 2006 | 92 | 11 | 1 |
| Baseline predictors of tolerability.      | Heart | 2006 | 84 | 6  | 1 |
| Pathologic assessment of the vulnerabl    | Heart | 2006 | 90 | 12 | 1 |
| Protective effect of an acute oral loadii | Heart | 2007 | 93 | 6  | 1 |
| Target lesion revascularisation in patie  | Heart | 2007 | 93 | 6  | 1 |
| Effects of metoprolol and carvedilol ..   | Heart | 2007 | 93 | 8  | 1 |
| Renin: friend or foe                      | Heart | 2007 | 93 | 9  | 1 |
| Optimum guidance of complex PCI..         | Heart | 2007 | 90 | 9  | 1 |
| Highly active antiretroviral therapy      | Heart | 2007 | 92 | 8  | 1 |
| Long term effects of bosentan therapy     | Heart | 2007 | 93 | 5  | 1 |
| Adherence to statin treatment             | Heart | 2008 | 88 | 3  | 1 |
| Clinical indications for genetic.         | Heart | 2008 | 94 | 4  | 1 |
| Effects of enzyme replacement therap      | Heart | 2008 | 94 | 2  | 1 |
| Effects of enzyme replacement therap      | Heart | 2009 | 94 | 2  | 1 |
| Fractional Flow Reserve: a review         | Heart | 2008 | 94 | 7  | 1 |
| Fractional Flow Reserve: a review         | Heart | 2009 | 94 | 7  | 1 |
| Long-term safety . . .                    | Heart | 2008 | 93 | 8  | 1 |
| Pulmonary arterial hypertension in adu    | Heart | 2009 | 93 | 6  | 1 |
| n-3 polyunsaturated fatty                 | Heart | 2009 | 95 | 7  | 1 |
| Safety of myocardial flash-contrast       | Heart | 2009 | 94 | 12 | 1 |

|                                                    |      |    |    |   |
|----------------------------------------------------|------|----|----|---|
| Apoptosis: a pivotal event or an epiph Heart       | 2002 | 84 | 4  | 0 |
| The pNNx files: re-examining a widely Heart        | 2002 | 88 | 4  | 0 |
| Haemodynamic and catecholamine res Heart           | 2003 | 89 | 3  | 0 |
| QT dispersion and left ventricular morj Heart      | 2003 | 89 | 8  | 0 |
| QT dispersion and left ventricular morj Heart      | 2004 | 89 | 8  | 0 |
| Relation between heart rate, heart rhy Heart       | 2003 | 89 | 3  | 0 |
| Seasonality of coronary artery deaths Heart        | 2003 | 88 | 1  | 0 |
| Creatinine clearance and adverse hosp Heart        | 2003 | 89 | 9  | 0 |
| A comparison of coronary artery stenti Heart       | 2004 | 90 | 6  | 0 |
| Established and emerging coronary ris Heart        | 2004 | 90 | 12 | 0 |
| Established and emerging coronary ris Heart        | 2006 | 90 | 12 | 0 |
| Plasma von Willebrand factor, soluble Heart        | 2005 | 90 | 10 | 0 |
| Subclinical pulmonary vein narrowing Heart         | 2005 | 91 | 5  | 0 |
| New aspects of the ventricular septum Heart        | 2005 | 91 | 10 | 0 |
| Effect of power Doppler and digital sut Heart      | 2006 | 85 | 5  | 0 |
| Effect of power Doppler and digital sut Heart      | 2007 | 85 | 5  | 0 |
| Usefulness of transoesophageal echoc: Heart        | 2006 | 92 | 7  | 0 |
| Usefulness of transoesophageal echoc: Heart        | 2007 | 92 | 7  | 0 |
| Evaluation of restenosis and extent of Heart       | 2006 | 92 | 10 | 0 |
| Functional and prognostic implications Heart       | 2006 | 91 | 11 | 0 |
| Non-invasive evaluation of the myocar Heart        | 2006 | 92 | 3  | 0 |
| Non-invasive evaluation of the myocar Heart        | 2007 | 92 | 3  | 0 |
| Non-invasive evaluation of the myocar Heart        | 2008 | 92 | 3  | 0 |
| Influences of electrocardiographic ischaemi Heart  | 2006 | 92 | 11 | 0 |
| Ventricular mass and diastolic functio Heart       | 2006 | 84 | 6  | 0 |
| Plaque stabilisation by systemic and lo Heart      | 2006 | 90 | 12 | 0 |
| Evidence that pharmacological strateg Heart        | 2007 | 93 | 6  | 0 |
| Trimetazidine in the prevention of con: Heart      | 2007 | 93 | 6  | 0 |
| Improving end-of-life care for patients Heart      | 2007 | 93 | 8  | 0 |
| Consent bias in research: how to avoic Heart       | 2007 | 93 | 9  | 0 |
| Reflex syncope in children and adolesc Heart       | 2007 | 90 | 9  | 0 |
| Coronary interventions in the elderly Heart        | 2007 | 92 | 8  | 0 |
| Prediction of valve prosthesis-patient Heart       | 2007 | 93 | 5  | 0 |
| Long term efficacy and safety of atorv. Heart      | 2008 | 88 | 3  | 0 |
| Impact of blood pressure on the Doppl Heart        | 2008 | 94 | 4  | 0 |
| Outcomes with the use of glycoprotein Heart        | 2008 | 94 | 2  | 0 |
| Outcomes with the use of glycoprotein Heart        | 2009 | 94 | 2  | 0 |
| Contraindications to magnetic resonan Heart        | 2008 | 94 | 7  | 0 |
| Contraindications to magnetic resonan Heart        | 2009 | 94 | 7  | 0 |
| Variability of NT-proBNP plasma and u Heart        | 2008 | 93 | 8  | 0 |
| Can atrial fibrillation with a coarse elec Heart   | 2009 | 93 | 6  | 0 |
| Atrial fibrillation in heart failure: the cl Heart | 2009 | 95 | 7  | 0 |
| Women younger than 65 years with di Heart          | 2009 | 94 | 12 | 0 |
| Efficacy and safety of modafinil JNNP              | 2002 | 72 | 2  | 1 |
| Efficacy and safety of modafinil JNNP              | 2005 | 72 | 2  | 1 |
| Efficacy and safety of modafinil JNNP              | 2006 | 72 | 2  | 1 |
| Efficacy and safety of modafinil JNNP              | 2007 | 72 | 2  | 1 |
| Differential effects of three interferon JNNP      | 2002 | 73 | 2  | 1 |
| Differential effects of three interferon JNNP      | 2003 | 73 | 2  | 1 |
| Differential effects of three interferon JNNP      | 2006 | 73 | 2  | 1 |
| Differential effects of three interferon JNNP      | 2008 | 73 | 2  | 1 |

|                                               |      |    |    |   |
|-----------------------------------------------|------|----|----|---|
| Neutralising antibodies to interferon. JNNP   | 2002 | 73 | 5  | 1 |
| Neutralising antibodies to interferon. JNNP   | 2003 | 73 | 5  | 1 |
| Pramipexole in patients with Parkinson JNNP   | 2002 | 72 | 6  | 1 |
| Pramipexole in patients with Parkinson JNNP   | 2003 | 72 | 6  | 1 |
| Pramipexole in patients with Parkinson JNNP   | 2004 | 72 | 6  | 1 |
| Pramipexole in patients with Parkinson JNNP   | 2005 | 72 | 6  | 1 |
| Pramipexole in patients with Parkinson JNNP   | 2006 | 72 | 6  | 1 |
| Pramipexole in patients with Parkinson JNNP   | 2007 | 72 | 6  | 1 |
| Pramipexole in patients with Parkinson JNNP   | 2008 | 72 | 6  | 1 |
| Pramipexole in patients with Parkinson JNNP   | 2009 | 72 | 6  | 1 |
| Respective potencies of Botox and Dys JNNP    | 2002 | 72 | 4  | 1 |
| Respective potencies of Botox and Dys JNNP    | 2003 | 72 | 4  | 1 |
| Respective potencies of Botox and Dys JNNP    | 2004 | 72 | 4  | 1 |
| Respective potencies of Botox and Dys JNNP    | 2008 | 72 | 4  | 1 |
| Respective potencies of Botox and Dys JNNP    | 2009 | 72 | 4  | 1 |
| Cholinesterase inhibitor treatment JNNP       | 2002 | 72 | 3  | 1 |
| A new antiepileptic drug JNNP                 | 2002 | 72 | 4  | 1 |
| Impact of botulinum toxin type A. JNNP        | 2002 | 69 | 2  | 1 |
| Dual channel deep brain stimulation s JNNP    | 2002 | 73 | 3  | 1 |
| Dual channel deep brain stimulation s JNNP    | 2003 | 73 | 3  | 1 |
| Donepezil for cognitive impairments JNNP      | 2003 | 72 | 6  | 1 |
| Entacapone is beneficial in both fluctu JNNP  | 2003 | 74 | 8  | 1 |
| Entacapone is beneficial in both fluctu JNNP  | 2004 | 74 | 8  | 1 |
| Entacapone is beneficial in both fluctu JNNP  | 2005 | 74 | 8  | 1 |
| Goal setting and attainment in Alzheimer JNNP | 2003 | 73 | 5  | 1 |
| Amelioration of spinal myoclonus JNNP         | 2003 | 73 | 4  | 1 |
| "Cadasil coma": an underdiagnosed ac JNNP     | 2003 | 74 | 2  | 1 |
| A controlled study comparing visual fu JNNP   | 2003 | 74 | 3  | 1 |
| Differentiation of dementia with Lewy. JNNP   | 2003 | 73 | 2  | 1 |
| Differentiation of dementia with Lewy. JNNP   | 2005 | 73 | 2  | 1 |
| Prevalence and clinical correlates JNNP       | 2003 | 59 | 1  | 1 |
| Ropinirole in the treatment of restless JNNP  | 2004 | 75 | 1  | 1 |
| Ropinirole in the treatment of restless JNNP  | 2005 | 75 | 1  | 1 |
| The relationship between treatment wi JNNP    | 2004 | 75 | 1  | 1 |
| The relationship between treatment wi JNNP    | 2006 | 75 | 1  | 1 |
| The longitudinal relation between.. JNNP      | 2004 | 74 | 11 | 1 |
| The effect of immunomodulatory treat JNNP     | 2004 | 75 | 7  | 1 |
| The effect of immunomodulatory treat JNNP     | 2005 | 75 | 7  | 1 |
| The effect of immunomodulatory treat JNNP     | 2007 | 75 | 7  | 1 |
| The effect of immunomodulatory treat JNNP     | 2008 | 75 | 7  | 1 |
| The beneficial antispasticity effect.. JNNP   | 2004 | 75 | 11 | 1 |
| The Parkinson disease sleep JNNP              | 2004 | 73 | 6  | 1 |
| The Parkinson disease sleep JNNP              | 2007 | 73 | 6  | 1 |
| Clozapine in drug included psychosis JNNP     | 2004 | 75 | 5  | 1 |
| Botulinum toxin treatment for lower lir JNNP  | 2004 | 57 | 11 | 1 |
| A double blind randomised, parallel gr JNNP   | 2004 | 64 | 1  | 1 |
| A double blind randomised, parallel gr JNNP   | 2008 | 64 | 1  | 1 |
| Catechol-o-methyltransferase inhibiti JNNP    | 2005 | 63 | 4  | 1 |
| Malformation risks of anti epileptic JNNP     | 2005 | 77 | 2  | 1 |
| Intravenous immune globulins in patie JNNP    | 2005 | 71 | 2  | 1 |
| The long term retention of levetiracet JNNP   | 2006 | 77 | 1  | 1 |
| Quantification of central motor conduc JNNP   | 2006 | 77 | 3  | 1 |

|                                               |      |    |    |   |
|-----------------------------------------------|------|----|----|---|
| Clinical and neuropsychological follow. JNNP  | 2006 | 77 | 4  | 1 |
| Clinical and neuropsychological follow. JNNP  | 2009 | 77 | 4  | 1 |
| A double blind, randomised JNNP               | 2006 | 76 | 5  | 1 |
| Safety and tolerability of adjunctive.. JNNP  | 2007 | 78 | 9  | 1 |
| A multicentre longitudinal observation: JNNP  | 2007 | 78 | 5  | 1 |
| A multicentre longitudinal observation: JNNP  | 2008 | 78 | 5  | 1 |
| A multicentre longitudinal observation: JNNP  | 2009 | 78 | 5  | 1 |
| Operative techniques and morbidity. JNNP      | 2007 | 77 | 1  | 1 |
| Attentional deficits affect. JNNP             | 2007 | 77 | 10 | 1 |
| Dementia with lewy bodies.. JNNP              | 2007 | 78 | 11 | 1 |
| Dementia with lewy bodies.. JNNP              | 2008 | 78 | 11 | 1 |
| Treatment of shoulder pain.. JNNP             | 2007 | 78 | 8  | 1 |
| Cannabinoids in multiple sclerosis (CA JNNP   | 2007 | 76 | 12 | 1 |
| Modafinil for daytime JNNP                    | 2007 | 76 | 12 | 1 |
| Longitudinal multimodal imaging JNNP          | 2008 | 79 | 12 | 1 |
| Cholinesterase inhibitor JNNP                 | 2008 | 78 | 10 | 1 |
| Long-term effects of the concomitant JNNP     | 2009 | 80 | 6  | 1 |
| Dipyridamole plus aspirin versus aspiri JNNP  | 2009 | 79 | 11 | 1 |
| New acute and chronic black holes in r JNNP   | 2009 | 80 | 12 | 1 |
| HLA-DR 15 is associated with female s JNNP    | 2002 | 72 | 2  | 0 |
| HLA-DR 15 is associated with female s JNNP    | 2005 | 72 | 2  | 0 |
| HLA-DR 15 is associated with female s JNNP    | 2006 | 72 | 2  | 0 |
| HLA-DR 15 is associated with female s JNNP    | 2007 | 72 | 2  | 0 |
| Bladder dysfunction in acute transvers JNNP   | 2002 | 73 | 2  | 0 |
| Bladder dysfunction in acute transvers JNNP   | 2003 | 73 | 2  | 0 |
| Bladder dysfunction in acute transvers JNNP   | 2006 | 73 | 2  | 0 |
| Bladder dysfunction in acute transvers JNNP   | 2008 | 73 | 2  | 0 |
| Surgical treatment of temporal lobe eř JNNP   | 2002 | 73 | 5  | 0 |
| Surgical treatment of temporal lobe eř JNNP   | 2003 | 73 | 5  | 0 |
| Incidence and prediction of falls in Par JNNP | 2002 | 72 | 6  | 0 |
| Incidence and prediction of falls in Par JNNP | 2003 | 72 | 6  | 0 |
| Incidence and prediction of falls in Par JNNP | 2004 | 72 | 6  | 0 |
| Incidence and prediction of falls in Par JNNP | 2005 | 72 | 6  | 0 |
| Incidence and prediction of falls in Par JNNP | 2006 | 72 | 6  | 0 |
| Incidence and prediction of falls in Par JNNP | 2007 | 72 | 6  | 0 |
| Incidence and prediction of falls in Par JNNP | 2008 | 72 | 6  | 0 |
| Incidence and prediction of falls in Par JNNP | 2009 | 72 | 6  | 0 |
| Blood pressure and risk of headache: : JNNP   | 2002 | 72 | 4  | 0 |
| Blood pressure and risk of headache: : JNNP   | 2003 | 72 | 4  | 0 |
| Blood pressure and risk of headache: : JNNP   | 2004 | 72 | 4  | 0 |
| Blood pressure and risk of headache: : JNNP   | 2008 | 72 | 4  | 0 |
| Blood pressure and risk of headache: : JNNP   | 2009 | 72 | 4  | 0 |
| Adaptation of handwriting size under c JNNP   | 2002 | 72 | 3  | 0 |
| Intensity of rehabilitation: some answe JNNP  | 2002 | 72 | 4  | 0 |
| Neuronal metabolic changes in the cor JNNP    | 2002 | 69 | 2  | 0 |
| Long term psychosocial outcomes afte JNNP     | 2002 | 73 | 3  | 0 |
| Long term psychosocial outcomes afte JNNP     | 2003 | 73 | 3  | 0 |
| Behavioural disorders, Parkinson's disc JNNP  | 2003 | 72 | 6  | 0 |
| Post-transplantation HTLV-1 myelopat JNNP     | 2003 | 74 | 8  | 0 |
| Post-transplantation HTLV-1 myelopat JNNP     | 2004 | 74 | 8  | 0 |
| Post-transplantation HTLV-1 myelopat JNNP     | 2005 | 74 | 8  | 0 |
| Relation between medial temporal atrc JNNP    | 2003 | 73 | 5  | 0 |

|                                              |      |    |    |   |
|----------------------------------------------|------|----|----|---|
| Increased serum concentrations of tissue JN  | 2003 | 73 | 4  | 0 |
| Dissociation of affective modulation of JN   | 2003 | 74 | 2  | 0 |
| Hypothesis on the pathophysiology of JN      | 2003 | 74 | 3  | 0 |
| Progressive ventricular enlargement in JN    | 2003 | 73 | 2  | 0 |
| Progressive ventricular enlargement in JN    | 2005 | 73 | 2  | 0 |
| Frontotemporal dementia and Alzheimer JN     | 2003 | 59 | 1  | 0 |
| Persistence of pain induced by startle JN    | 2004 | 75 | 1  | 0 |
| Persistence of pain induced by startle JN    | 2005 | 75 | 1  | 0 |
| Visual command hallucinations in a pa JN     | 2004 | 75 | 1  | 0 |
| Visual command hallucinations in a pa JN     | 2006 | 75 | 1  | 0 |
| A variant of multifocal motor neuropat JN    | 2004 | 74 | 11 | 0 |
| Clinically evidenced unilateral dissociat JN | 2004 | 75 | 7  | 0 |
| Clinically evidenced unilateral dissociat JN | 2005 | 75 | 7  | 0 |
| Clinically evidenced unilateral dissociat JN | 2007 | 75 | 7  | 0 |
| Clinically evidenced unilateral dissociat JN | 2008 | 75 | 7  | 0 |
| Demographic and CT scan features rel JN      | 2004 | 75 | 11 | 0 |
| Apathy in Parkinson's disease JN             | 2004 | 73 | 6  | 0 |
| Apathy in Parkinson's disease JN             | 2007 | 73 | 6  | 0 |
| Association between apolipoprotein E ε JN    | 2004 | 75 | 5  | 0 |
| Reappraisal of Rasmussen's syndrome JN       | 2004 | 75 | 11 | 0 |
| What is the optimal dose of botulinum JN     | 2004 | 64 | 1  | 0 |
| What is the optimal dose of botulinum JN     | 2008 | 64 | 1  | 0 |
| Micrographia in Parkinson's disease: th JN   | 2005 | 63 | 4  | 0 |
| Sudden unexpected death in epilepsy JN       | 2005 | 77 | 2  | 0 |
| Clinical study of 222 patients with pur JN   | 2005 | 71 | 2  | 0 |
| Cortical laminar necrosis related to pro JN  | 2006 | 77 | 1  | 0 |
| Risk of multiple sclerosis after head in JN  | 2006 | 77 | 3  | 0 |
| Visuospatial functions in atypical parki JN  | 2006 | 77 | 4  | 0 |
| Visuospatial functions in atypical parki JN  | 2009 | 77 | 4  | 0 |
| Homocysteine and related genetic poly JN     | 2006 | 76 | 5  | 0 |
| Secondary motor disturbances in 101 JN       | 2007 | 78 | 9  | 0 |
| Improvement of gait by chronic, high ( JN    | 2007 | 78 | 5  | 0 |
| Improvement of gait by chronic, high ( JN    | 2008 | 78 | 5  | 0 |
| Improvement of gait by chronic, high ( JN    | 2009 | 78 | 5  | 0 |
| Expanded motor and psychiatric phen JN       | 2007 | 77 | 1  | 0 |
| Sleep-disordered breathing after strok JN    | 2007 | 77 | 10 | 0 |
| Cognitive impairment in Parkinson's di JN    | 2007 | 78 | 11 | 0 |
| Cognitive impairment in Parkinson's di JN    | 2008 | 78 | 11 | 0 |
| Abnormalities in cortical and periphera JN   | 2007 | 78 | 8  | 0 |
| Placebo controlled, randomised, doubl JN     | 2007 | 76 | 12 | 0 |
| Stimulation of the subthalamic nucleu JN     | 2007 | 76 | 12 | 0 |
| Poor attentional function predicts cogn JN   | 2008 | 79 | 12 | 0 |
| Proxy and self-report agreement on th JN     | 2008 | 78 | 10 | 0 |
| Deep frontal and periventricular age r JN    | 2009 | 80 | 6  | 0 |
| Abnormalities in the cerebrospinal fluid JN  | 2009 | 79 | 11 | 0 |
| Proinflammatory cell stress in sporadic JN   | 2009 | 80 | 12 | 0 |





|   |   |
|---|---|
| 1 | 1 |
| 1 | 1 |
| 1 | 1 |
| 1 | 1 |
| 1 | 1 |
| 1 | 1 |
| 1 | 1 |
| 1 | 1 |
| 1 | 1 |
| 1 | 1 |
| 1 | 1 |
| 1 | 2 |
| 1 | 2 |
| 1 | 2 |
| 1 | 1 |
| 1 | 1 |
| 1 | 1 |
| 1 | 1 |
| 2 | 2 |
| 2 | 2 |
| 1 | 1 |
| 1 | 1 |
| 1 | 1 |
| 1 | 1 |
| 1 | 1 |
| 1 | 1 |
| 1 | 1 |
| 1 | 1 |
| 1 | 1 |
| 1 | 2 |
| 1 | 1 |
| 1 | 1 |
| 1 | 1 |
| 2 | 4 |
| 1 | 2 |
| 1 | 1 |
| 1 | 2 |
| 1 | 2 |
| 2 | 2 |
| 2 | 2 |
| 1 | 2 |
| 1 | 4 |
| 1 | 4 |
| 1 | 1 |
| 1 | 1 |
| 1 | 4 |
| 2 | 5 |
| 1 | 1 |
| 1 | 4 |
| 1 | 1 |
| 1 | 1 |
| 1 | 1 |
| 1 | 1 |
| 2 | 1 |
| 2 | 4 |

|   |   |
|---|---|
| 1 | 4 |
| 1 | 1 |
| 1 | 1 |
| 1 | 2 |
| 1 | 2 |
| 1 | 4 |
| 2 | 4 |
| 2 | 4 |
| 2 | 4 |
| 2 | 4 |
| 1 | 1 |
| 1 | 2 |
| 1 | 1 |
| 1 | 1 |
| 1 | 1 |
| 2 | 4 |
| 2 | 4 |
| 2 | 4 |
| 2 | 4 |
| 2 | 4 |
| 2 | 4 |
| 1 | 1 |
| 2 | 4 |
| 2 | 2 |
| 1 | 4 |
| 2 | 4 |
| 2 | 1 |
| 1 | 2 |
| 1 | 2 |
| 2 | 4 |
| 2 | 4 |
| 1 | 4 |
| 1 | 4 |
| 1 | 4 |
| 1 | 4 |
| 2 | 4 |
| 2 | 4 |
| 2 | 4 |
| 2 | 4 |
| 2 | 4 |
| 2 | 4 |
| 2 | 4 |
| 2 | 4 |
| 1 | 2 |
| 1 | 1 |
| 1 | 4 |
| 1 | 4 |
| 2 | 4 |
| 1 | 1 |
| 2 | 4 |
| 2 | 4 |
| 1 | 2 |
| 2 | 2 |
| 1 | 4 |
| 1 | 4 |

|   |   |
|---|---|
| 1 | 2 |
| 1 | 2 |
| 2 | 4 |
| 1 | 1 |
| 1 | 1 |
| 2 | 1 |
| 2 | 1 |
| 2 | 4 |
| 1 | 1 |
| 2 | 4 |
| 1 | 4 |
| 1 | 4 |
| 1 | 4 |
| 1 | 2 |
| 1 | 1 |
| 1 | 1 |
| 1 | 4 |
| 2 | 5 |
| 2 | 5 |
| 1 | 4 |
| 2 | 4 |
| 1 | 4 |
| 1 | 4 |
| 2 | 5 |
| 2 | 4 |
| 2 | 4 |
| 2 | 4 |
| 2 | 4 |
| 2 | 4 |
| 2 | 4 |
| 2 | 4 |
| 1 | 4 |
| 1 | 4 |
| 1 | 4 |
| 2 | 4 |
| 2 | 4 |
| 1 | 4 |
| 1 | 4 |
| 2 | 4 |
| 2 | 4 |
| 2 | 4 |
| 2 | 4 |
| 2 | 4 |
| 2 | 4 |
| 2 | 4 |
| 2 | 5 |
| 2 | 5 |
| 1 | 4 |
| 2 | 1 |
| 1 | 1 |
| 2 | 5 |
| 2 | 5 |
| 1 | 2 |
| 1 | 2 |
| 1 | 2 |
| 1 | 2 |

|   |   |
|---|---|
| 1 | 2 |
| 1 | 2 |
| 1 | 2 |
| 1 | 3 |
| 2 | 4 |
| 2 | 4 |
| 2 | 4 |
| 1 | 1 |
| 2 | 2 |
| 2 | 2 |
| 2 | 2 |
| 2 | 2 |
| 1 | 4 |
| 1 | 4 |
| 2 | 5 |
| 2 | 4 |
| 2 | 5 |
| 2 | 5 |
| 1 | 1 |
| 2 | 4 |
| 2 | 4 |
| 1 | 1 |
| 1 | 1 |
| 2 | 5 |
| 2 | 5 |
| 2 | 2 |
| 1 | 1 |
| 1 | 1 |
| 2 | 1 |
| 1 | 2 |
| 1 | 1 |
| 1 | 1 |
| 1 | 1 |
| 2 | 4 |
| 2 | 1 |
| 2 | 5 |
| 1 | 1 |
| 2 | 1 |
| 1 | 4 |
| 1 | 1 |
| 1 | 1 |
| 2 | 5 |
| 2 | 2 |
| 2 | 2 |
| 2 | 2 |
| 2 | 4 |
| 1 | 2 |
| 1 | 2 |
| 2 | 5 |

|   |   |
|---|---|
| 2 | 5 |
| 1 | 2 |
| 2 | 4 |

|   |   |
|---|---|
| 2 | 2 |
| 2 | 4 |
| 2 | 4 |
| 2 | 5 |
| 2 | 5 |
| 2 | 5 |
| 1 | 1 |
| 2 | 4 |
| 2 | 4 |
| 2 | 2 |
| 2 | 4 |
| 2 | 4 |
| 2 | 4 |
| 1 | 4 |
| 1 | 4 |
| 2 | 5 |
| 2 | 4 |
| 2 | 4 |
| 1 | 4 |
| 1 | 4 |
| 2 | 5 |
| 2 | 5 |
| 1 | 1 |
| 1 | 1 |
| 2 | 5 |
| 2 | 2 |
| 2 | 4 |
| 2 | 4 |
| 2 | 4 |
| 1 | 1 |
| 1 | 1 |
| 2 | 2 |
| 2 | 4 |
| 1 | 1 |
| 1 | 1 |
| 2 | 5 |
| 2 | 5 |
| 2 | 2 |
| 2 | 4 |
| 1 | 1 |
| 1 | 1 |

|   |   |
|---|---|
| 1 | 2 |
| 2 | 5 |
| 2 | 5 |
| 1 | 1 |
| 2 | 2 |
| 2 | 5 |
| 2 | 5 |
| 2 | 5 |
| 2 | 2 |
| 2 | 2 |
| 2 | 4 |
| 2 | 4 |
| 2 | 2 |
| 1 | 4 |
| 1 | 4 |
| 2 | 5 |
| 2 | 5 |
| 2 | 5 |
| 2 | 5 |
| 2 | 5 |
| 1 | 2 |
| 1 | 2 |
| 2 | 4 |
| 2 | 4 |
| 2 | 4 |
| 2 | 1 |
| 2 | 4 |
| 2 | 5 |
| 2 | 5 |

|   |   |
|---|---|
| 2 | 4 |
| 2 | 2 |
| 2 | 2 |
| 2 | 4 |
| 2 | 4 |
| 2 | 4 |
| 2 | 4 |
| 2 | 4 |
| 2 | 2 |
| 2 | 4 |
| 2 | 4 |
| 2 | 4 |
| 2 | 5 |
| 2 | 2 |
| 2 | 5 |
| 2 | 4 |

|   |   |
|---|---|
| 2 | 5 |
| 2 | 4 |

|   |   |
|---|---|
| 2 | 4 |
| 2 | 4 |
| 2 | 4 |
| 2 | 5 |
| 1 | 1 |
| 1 | 1 |
| 1 | 1 |
| 2 | 2 |
| 2 | 2 |
| 2 | 4 |
| 2 | 4 |
| 2 | 2 |
| 2 | 2 |
| 2 | 2 |
| 2 | 4 |
| 2 | 2 |
| 1 | 1 |
| 2 | 2 |
| 2 | 4 |
| 2 | 4 |
| 2 | 4 |
| 2 | 2 |
| 2 | 5 |
| 2 | 4 |
| 2 | 4 |
| 2 | 4 |
| 2 | 4 |
| 2 | 5 |
| 2 | 5 |
| 1 | 2 |
| 2 | 5 |
| 2 | 5 |
| 1 | 4 |
| 2 | 4 |
| 2 | 4 |
| 2 | 4 |
| 2 | 4 |
| 2 | 4 |
| 1 | 1 |
| 1 | 1 |
| 1 | 1 |
| 1 | 1 |
| 2 | 2 |
| 2 | 2 |
| 2 | 2 |
| 2 | 4 |
| 2 | 5 |
| 1 | 4 |
| 2 | 5 |
| 2 | 4 |
| 2 | 4 |
| 2 | 5 |
| 2 | 5 |

|   |   |
|---|---|
| 1 | 1 |
| 2 | 4 |
| 1 | 1 |
| 1 | 1 |
| 1 | 1 |
| 2 | 4 |
| 2 | 4 |
| 2 | 5 |
| 2 | 4 |
| 2 | 4 |
| 2 | 4 |
| 2 | 4 |
| 2 | 4 |
| 2 | 4 |
| 2 | 4 |
| 1 | 4 |
| 2 | 4 |
| 2 | 4 |
| 2 | 2 |
| 1 | 5 |
| 2 | 5 |
| 2 | 5 |
| 2 | 5 |
| 2 | 5 |
| 2 | 4 |
| 2 | 4 |
| 2 | 4 |
| 2 | 4 |
| 2 | 4 |
| 2 | 4 |
| 2 | 4 |
| 2 | 4 |
| 1 | 2 |
| 2 | 1 |
| 2 | 1 |
| 1 | 1 |
| 1 | 1 |
| 2 | 2 |
| 2 | 2 |
| 2 | 2 |
| 2 | 2 |
| 2 | 5 |
| 2 | 2 |
| 2 | 2 |
| 2 | 2 |
| 2 | 2 |
| 2 | 2 |
| 2 | 5 |
| 2 | 5 |
| 2 | 5 |
| 2 | 5 |
| 2 | 5 |
| 2 | 2 |
| 2 | 2 |
| 1 | 2 |
| 1 | 2 |
| 1 | 1 |



|   |   |
|---|---|
| 2 | 1 |
| 2 | 4 |
| 2 | 4 |
| 2 | 4 |
| 2 | 4 |
| 2 | 4 |
| 1 | 2 |
| 1 | 4 |
| 2 | 4 |
| 2 | 4 |
| 2 | 4 |
| 2 | 5 |
| 1 | 4 |
| 2 | 5 |
| 2 | 2 |
| 2 | 5 |
| 2 | 5 |
| 2 | 2 |
| 2 | 2 |
| 1 | 4 |
| 1 | 4 |
| 2 | 4 |
| 2 | 4 |
| 2 | 4 |
| 2 | 4 |
| 2 | 4 |
| 2 | 5 |
| 2 | 5 |
| 2 | 5 |
| 2 | 4 |
| 2 | 4 |
| 2 | 4 |
| 2 | 4 |
| 2 | 4 |
| 2 | 4 |
| 2 | 4 |
| 2 | 4 |

|   |   |
|---|---|
| 2 | 4 |
|---|---|

|   |   |
|---|---|
| 2 | 4 |
| 2 | 4 |
| 2 | 4 |
| 2 | 5 |
| 2 | 2 |
| 2 | 4 |
| 2 | 2 |
| 2 | 5 |
| 2 | 2 |
| 2 | 2 |
| 2 | 2 |
| 2 | 4 |

|   |   |
|---|---|
| 2 | 4 |
| 2 | 4 |
| 1 | 4 |
| 2 | 4 |
| 2 | 4 |
| 2 | 4 |
| 2 | 4 |
| 2 | 4 |
| 2 | 4 |
| 2 | 4 |
| 2 | 5 |
| 2 | 4 |
| 2 | 5 |
| 1 | 4 |
| 1 | 4 |
| 2 | 4 |
| 2 | 4 |
| 2 | 4 |
| 2 | 4 |
| 2 | 5 |
| 2 | 5 |
| 2 | 4 |
| 2 | 4 |
| 2 | 2 |
| 2 | 5 |
| 2 | 4 |
| 1 | 1 |
| 1 | 4 |
| 1 | 2 |
| 2 | 4 |
| 1 | 1 |
| 1 | 1 |
| 1 | 1 |
| 1 | 1 |
| 1 | 1 |
| 1 | 1 |
| 1 | 1 |
| 1 | 1 |
| 1 | 1 |
| 2 | 1 |
| 2 | 1 |
| 2 | 1 |
| 2 | 1 |
| 2 | 4 |
| 2 | 4 |
| 1 | 1 |
| 1 | 1 |
| 1 | 2 |
| 1 | 2 |
| 2 | 2 |
| 2 | 2 |
| 1 | 1 |
| 2 | 1 |
| 2 | 2 |
| 2 | 4 |

|   |   |
|---|---|
| 1 | 1 |
| 1 | 1 |
| 1 | 1 |
| 1 | 4 |
| 2 | 4 |
| 2 | 4 |
| 2 | 4 |
| 2 | 4 |
| 2 | 4 |
| 2 | 4 |
| 2 | 2 |
| 2 | 2 |
| 2 | 2 |
| 2 | 2 |
| 2 | 2 |
| 1 | 1 |
| 2 | 4 |
| 2 | 2 |
| 2 | 2 |
| 2 | 4 |
| 1 | 1 |
| 2 | 4 |
| 2 | 4 |
| 2 | 4 |
| 2 | 4 |
| 2 | 4 |
| 1 | 2 |
| 1 | 2 |
| 1 | 1 |
| 1 | 1 |
| 1 | 1 |
| 1 | 1 |
| 1 | 1 |
| 1 | 1 |
| 1 | 1 |
| 1 | 1 |
| 2 | 4 |
| 1 | 1 |
| 1 | 1 |
| 1 | 1 |
| 2 | 2 |
| 2 | 2 |
| 2 | 4 |
| 2 | 4 |
| 2 | 2 |
| 1 | 1 |
| 1 | 2 |
| 1 | 1 |
| 2 | 4 |
| 2 | 4 |
| 2 | 4 |
| 2 | 4 |
| 2 | 4 |
| 2 | 4 |
| 2 | 2 |
| 2 | 4 |



|   |   |
|---|---|
| 2 | 4 |
| 2 | 4 |
| 1 | 4 |
| 1 | 4 |
| 2 | 4 |
| 2 | 4 |
| 2 | 2 |
| 2 | 4 |
| 2 | 4 |
| 2 | 2 |
| 1 | 1 |
| 2 | 2 |
| 2 | 4 |
|   | 4 |
| 1 | 2 |
| 2 | 4 |
| 2 | 2 |
| 2 | 1 |
| 1 | 1 |
| 1 | 1 |
| 1 | 1 |
| 1 | 1 |
| 1 | 4 |
| 2 | 4 |
| 1 | 1 |
| 1 | 1 |
| 2 | 2 |
| 2 | 2 |
| 2 | 2 |
| 2 | 1 |
| 1 | 1 |
| 1 | 2 |
| 1 | 2 |
| 1 | 2 |
| 2 | 1 |
| 2 | 1 |
| 2 | 4 |
| 1 | 4 |
| 1 | 4 |
| 1 | 1 |
| 2 | 4 |
| 2 | 4 |
| 2 | 4 |
| 2 | 4 |
| 2 | 4 |
| 2 | 2 |
| 2 | 5 |
| 1 | 1 |
| 1 | 1 |
| 2 | 4 |
| 2 | 4 |
| 2 | 2 |
| 2 | 4 |
| 2 | 4 |
| 2 | 4 |



|   |   |
|---|---|
| 2 | 2 |
| 2 | 2 |
| 1 | 1 |
| 1 | 1 |
| 1 | 1 |
| 1 | 1 |
| 1 | 1 |
| 1 | 1 |
| 1 | 1 |
| 1 | 1 |
| 1 | 1 |
| 1 | 2 |
| 1 | 2 |
| 1 | 2 |
| 1 | 2 |
| 1 | 2 |
| 2 | 4 |
| 2 | 2 |
| 1 | 2 |
| 2 | 2 |
| 2 | 2 |
| 1 | 2 |
| 1 | 2 |
| 1 | 2 |
| 2 | 1 |
| 2 | 2 |
| 2 | 4 |
| 2 | 1 |
| 2 | 1 |
| 2 | 1 |
| 2 | 4 |
| 1 | 1 |
| 1 | 1 |
| 2 | 4 |
| 2 | 4 |
| 2 | 2 |
| 2 | 4 |
| 2 | 4 |
| 2 | 4 |
| 2 | 4 |
| 2 | 4 |
| 2 | 4 |
| 2 | 1 |
| 2 | 1 |
| 2 | 1 |
| 1 | 1 |
| 2 | 4 |
| 1 | 2 |
| 1 | 2 |
| 1 | 1 |
| 2 | 2 |
| 1 | 1 |
| 2 | 4 |
| 2 | 4 |
